# Supplementary material for: Modified Kagan's amide: synthesis and application as a chiral solvating agent for hydrogen-bonding based chiral discrimination in NMR
Source: Royal Society of Chemistry journal article supplement (doi:10.1039/c5ra06959a), 2015-01-01
Supplement: c5ra06959a1.pdf [file c5ra06959a1.pdf]

## *Supporting information*

### **Modified Kagan's Amide, Synthesis and Applications as Chiral Solvating Agent for Hydrogen-Bonding Based Chiral Discrimination in NMR**

Nilesh Jain, Ravi B. Patel and Ashutosh V. Bedekar\*

|                                    | <i>Index</i> |
|------------------------------------|--------------|
| <b>CD graph:</b>                   | <b>2</b>     |
| <b>HPLC chart:</b>                 | <b>2-3</b>   |
| <b>Spectral chart of compound:</b> | <b>2-18</b>  |
| <b>NMR spectra of CSA:</b>         | <b>19-35</b> |
| <b>Single crystal data:</b>        | <b>36-42</b> |

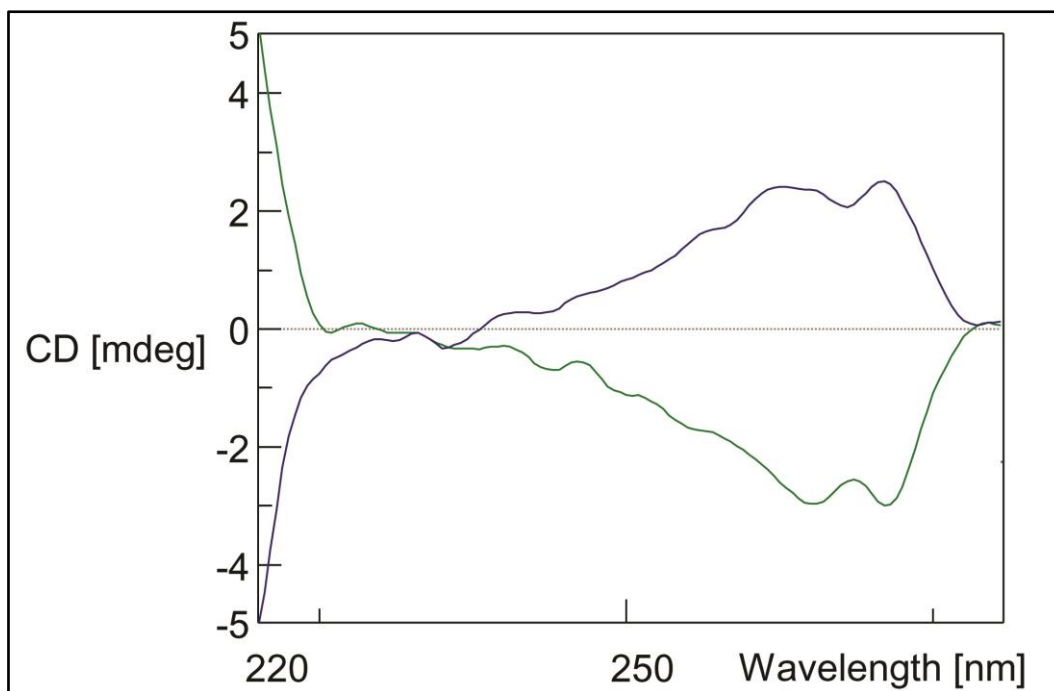

CD spectra of (*S*)-**3** & (*R*)-**3** alcohol in Acetonitrile  $1 \times 10^{-4}$  (Blue line for (*S*)-isomer & Green line for (*R*)-isomer)

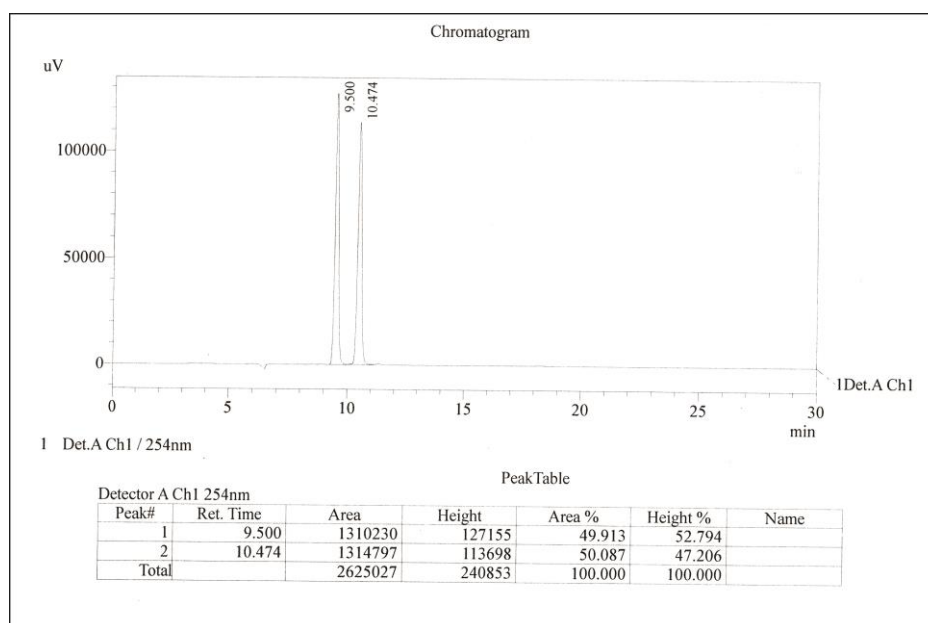

HPLC chart of racemic ( $\pm$ )-**3**

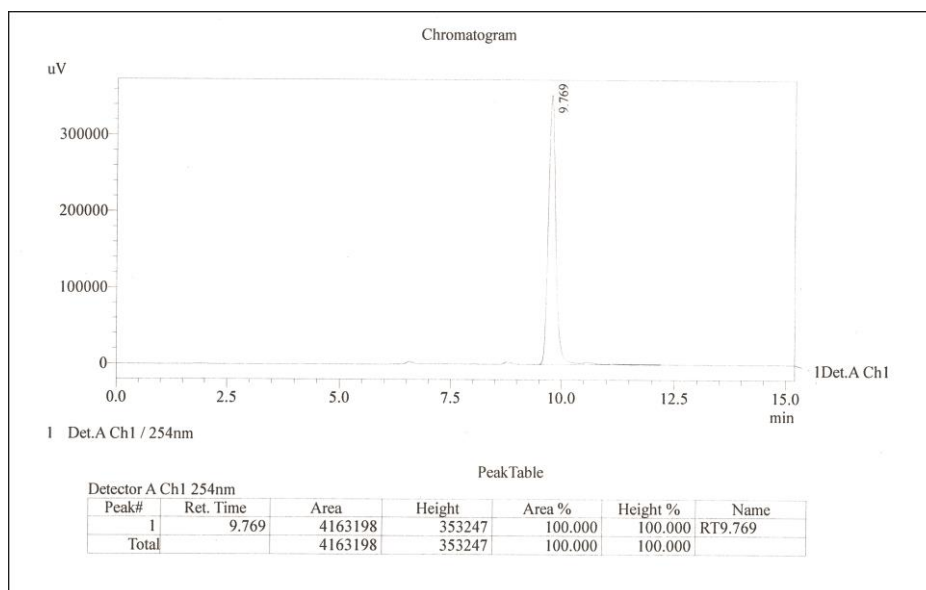

HPLC chart of compound (S)-3

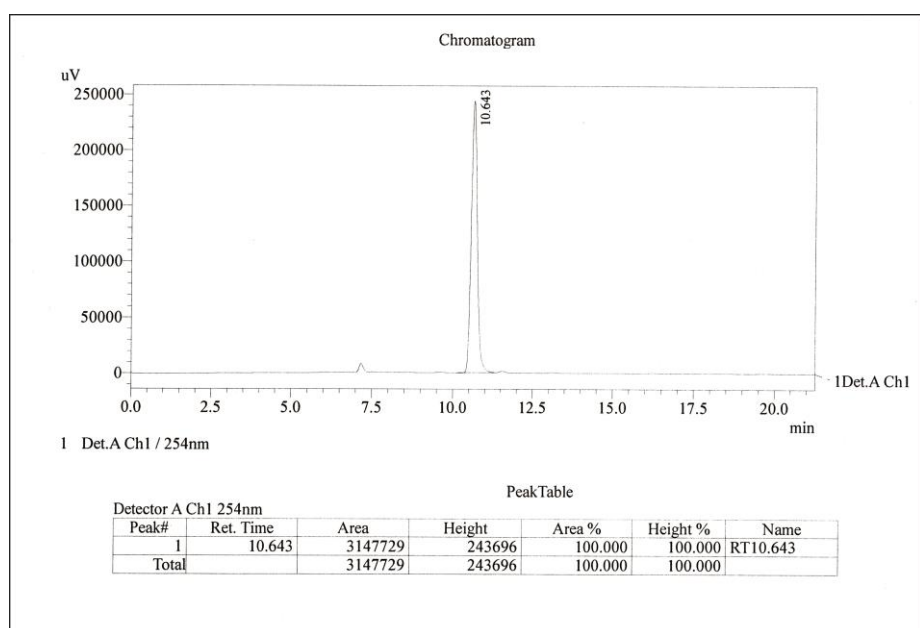

HPLC chart of compound (R)-3

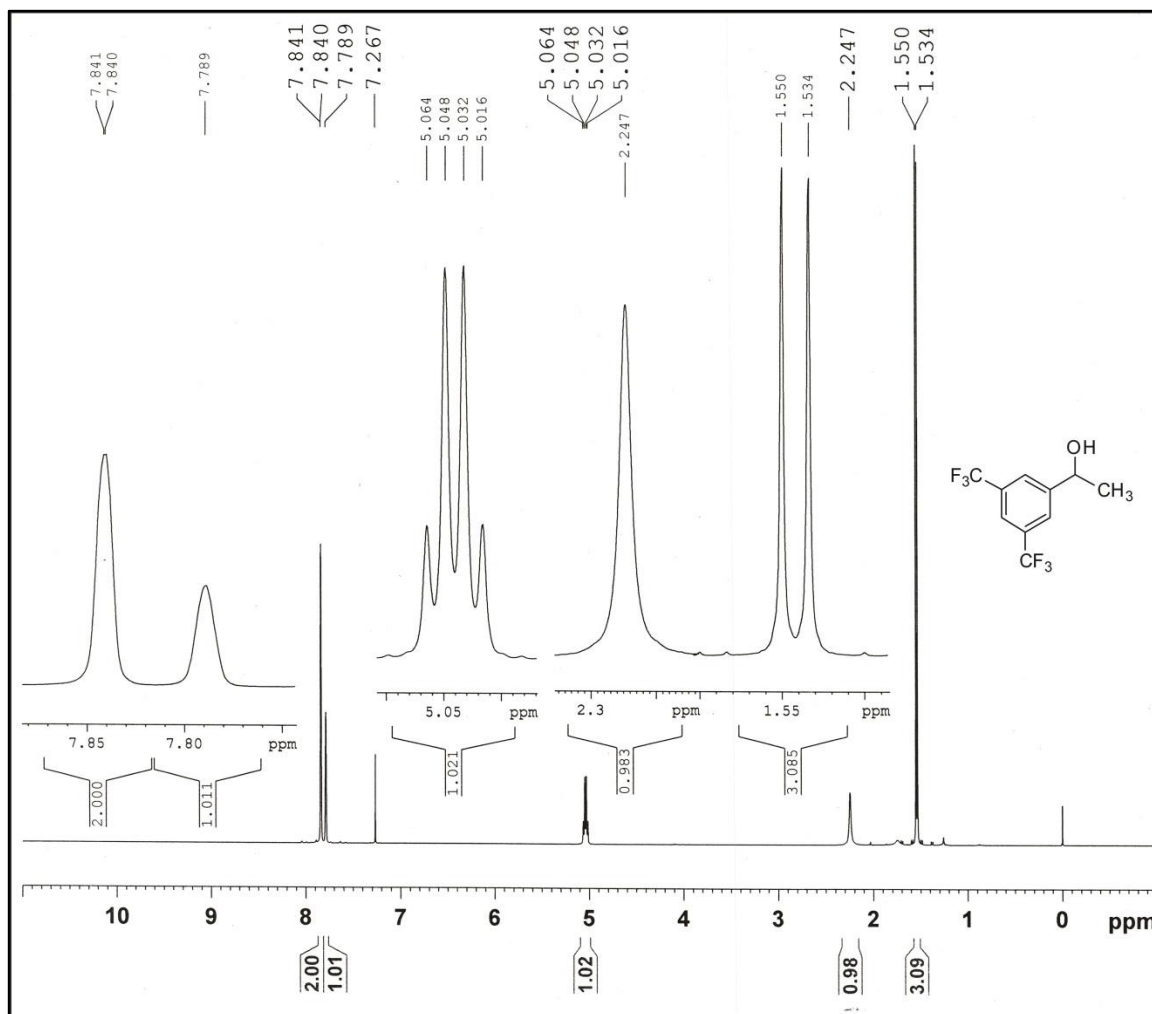

<sup>1</sup>H-NMR spectra of compound (S)-3 in CDCl<sub>3</sub>

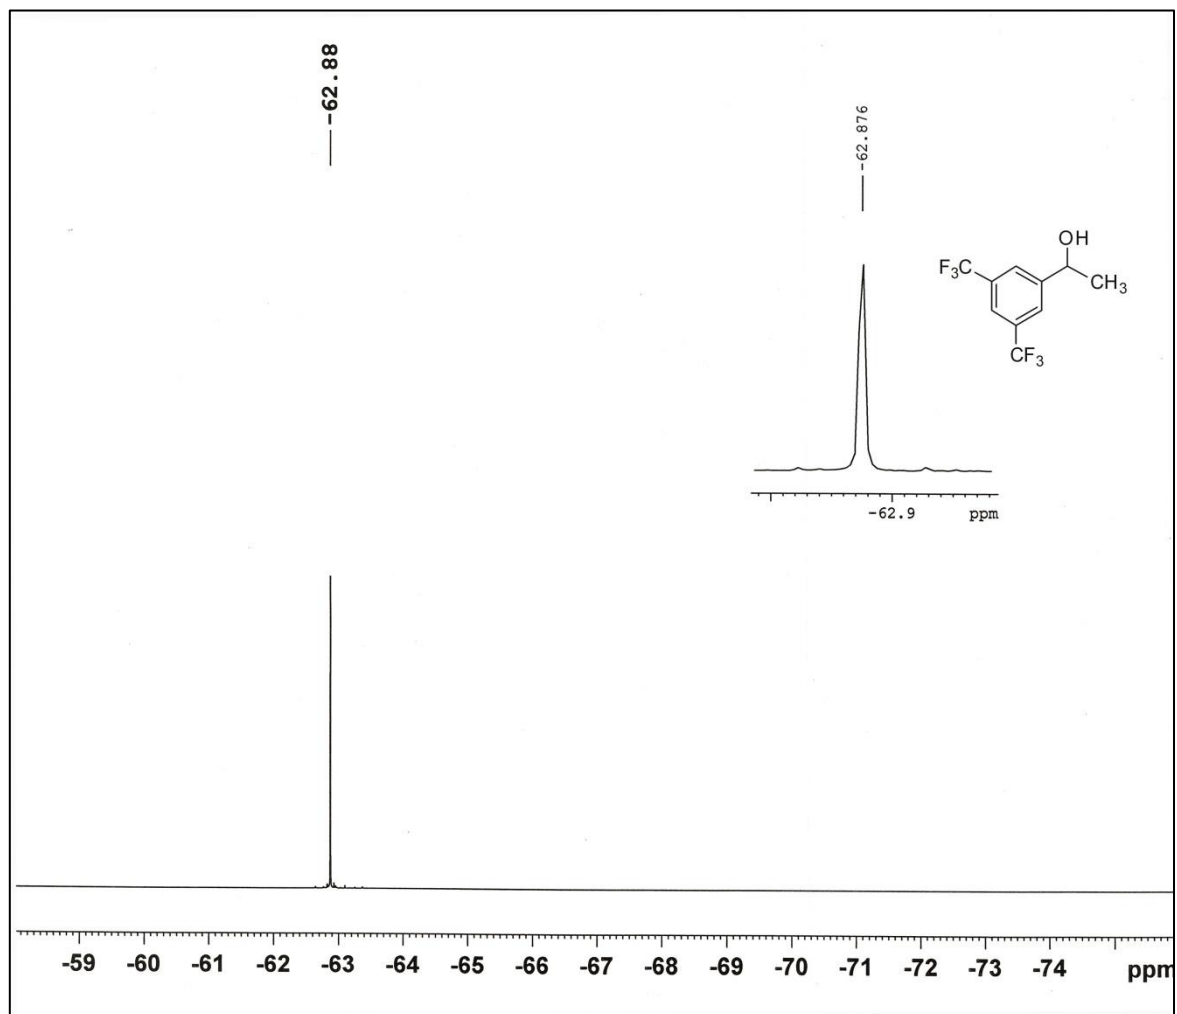

$^{19}\text{F}$ -NMR spectra of compound (S)-3 in  $\text{CDCl}_3$

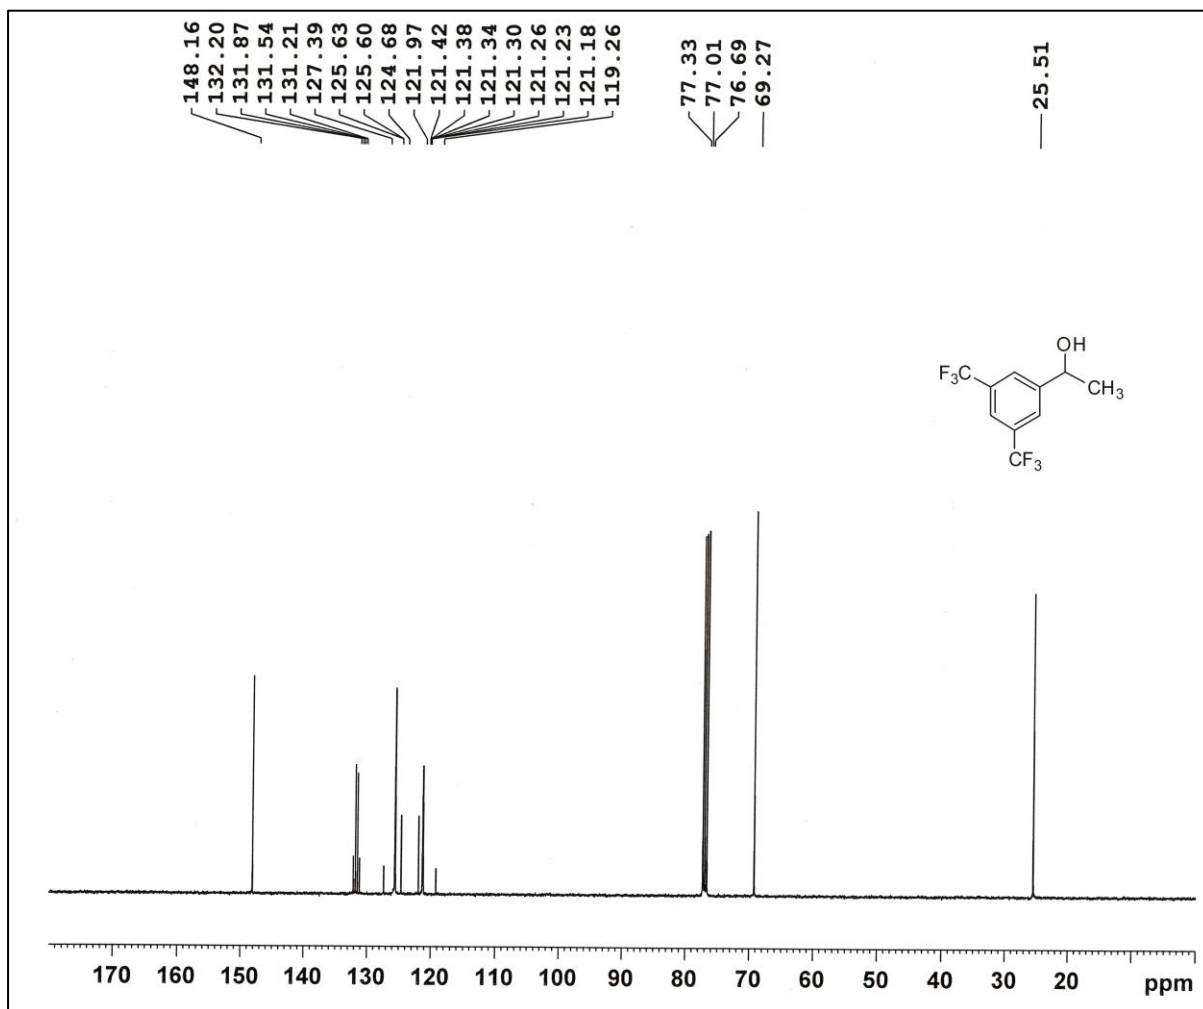

$^{13}\text{C}$ -NMR spectra of compound (S)-3 in  $\text{CDCl}_3$

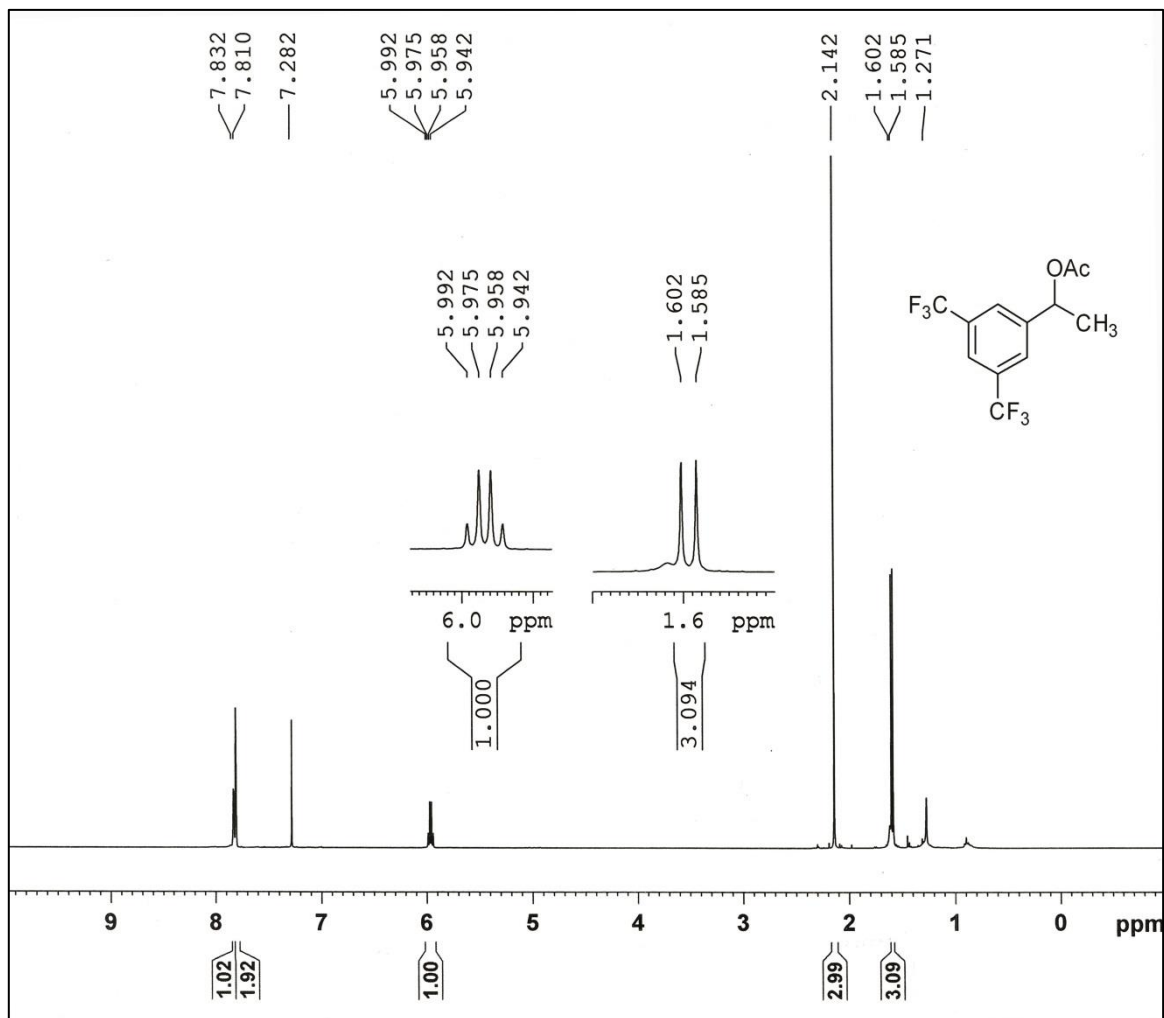

<sup>1</sup>H-NMR spectra of compound (R)-4 in CDCl<sub>3</sub>

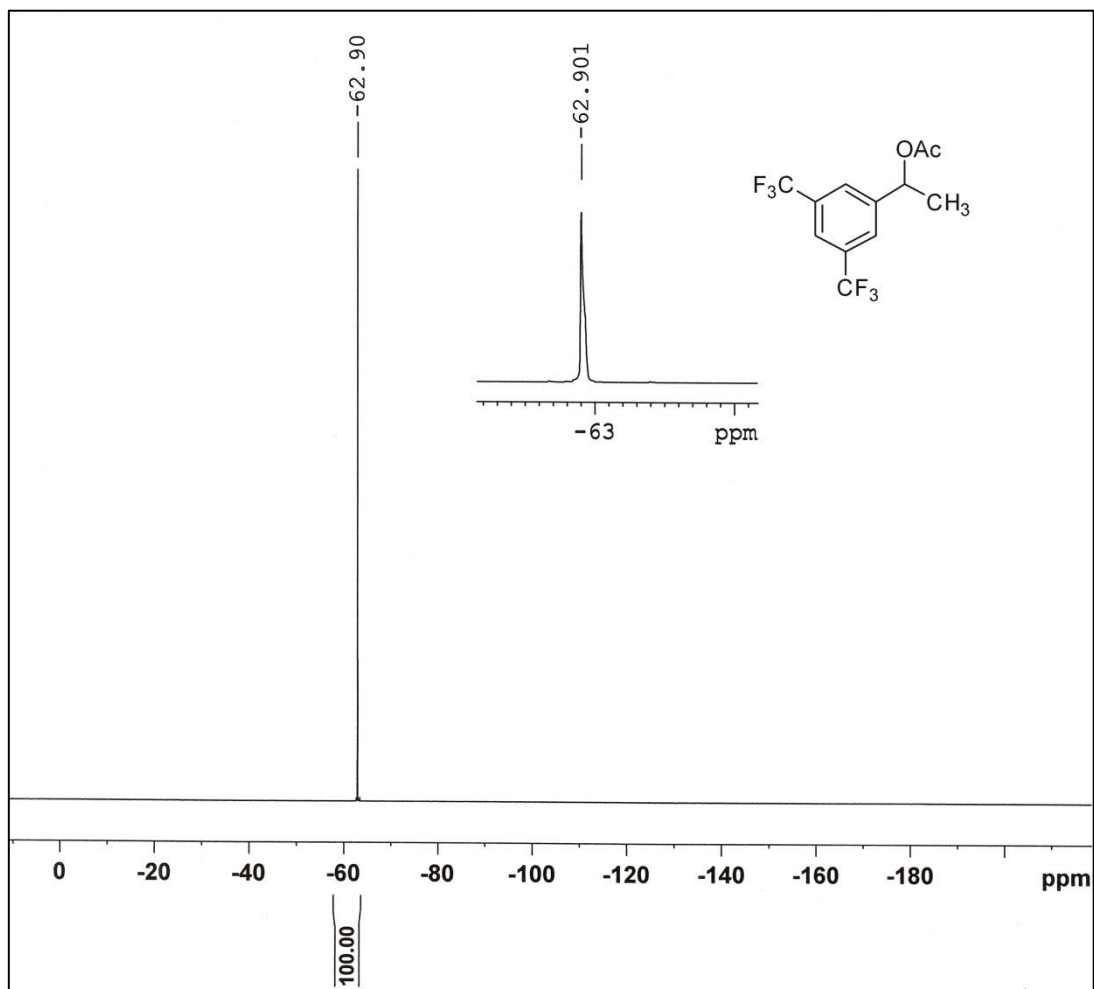

$^{19}\text{F}$ -NMR spectra of compound (*R*)-**4** in  $\text{CDCl}_3$



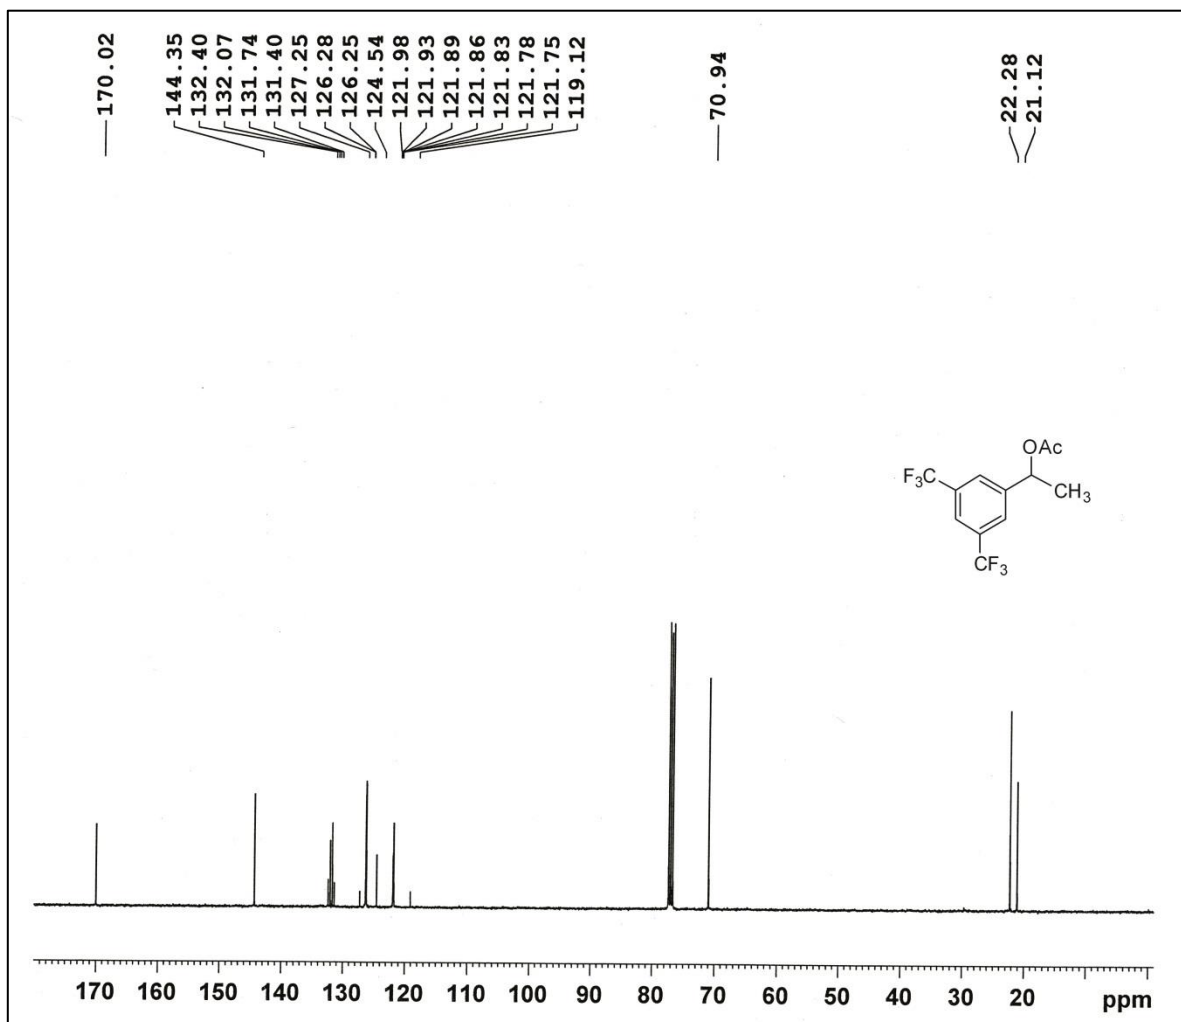

$^{13}\text{C-NMR}$  spectra of compound (*R*)-4 in  $\text{CDCl}_3$

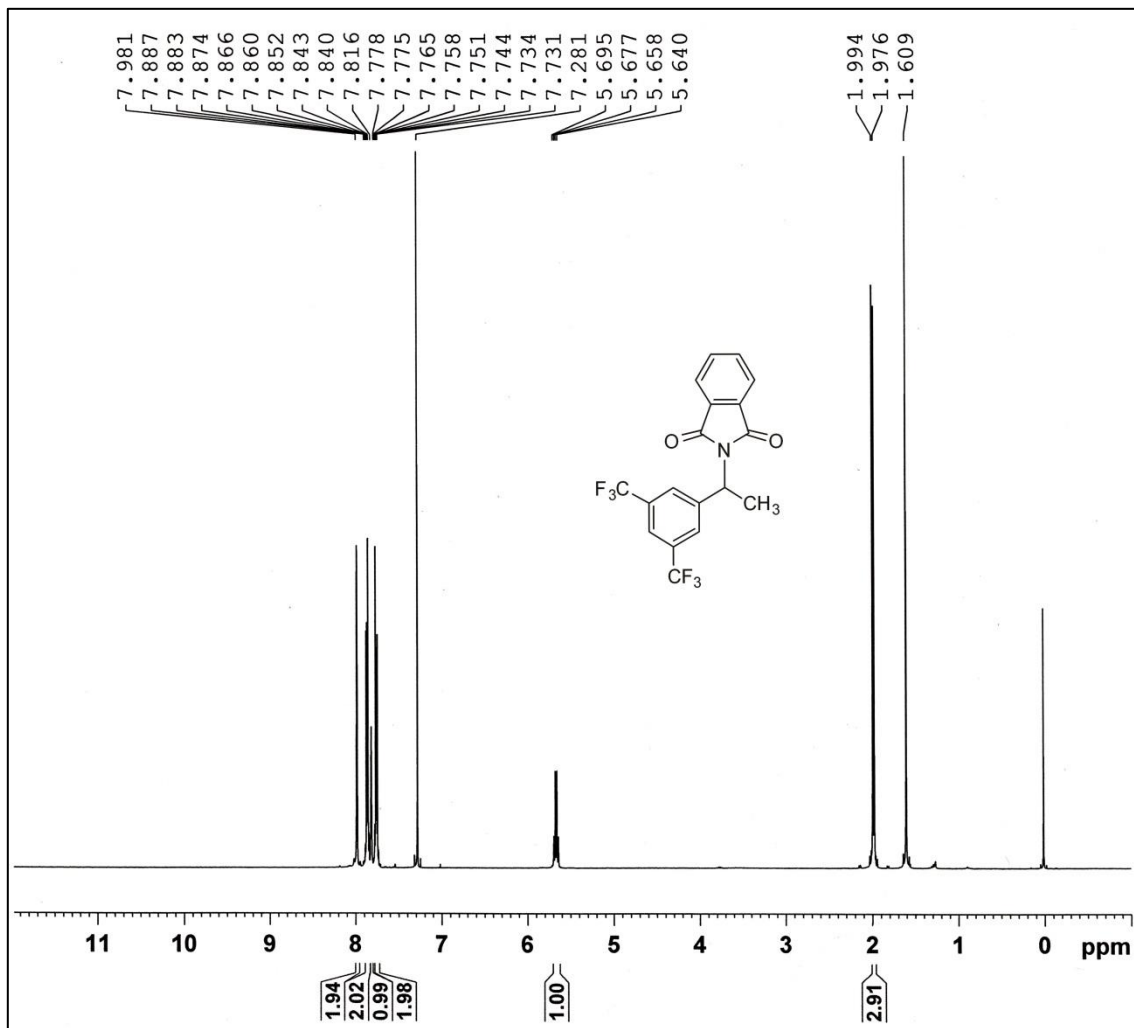

<sup>1</sup>H-NMR spectra of compound (S)-5 in CDCl<sub>3</sub>

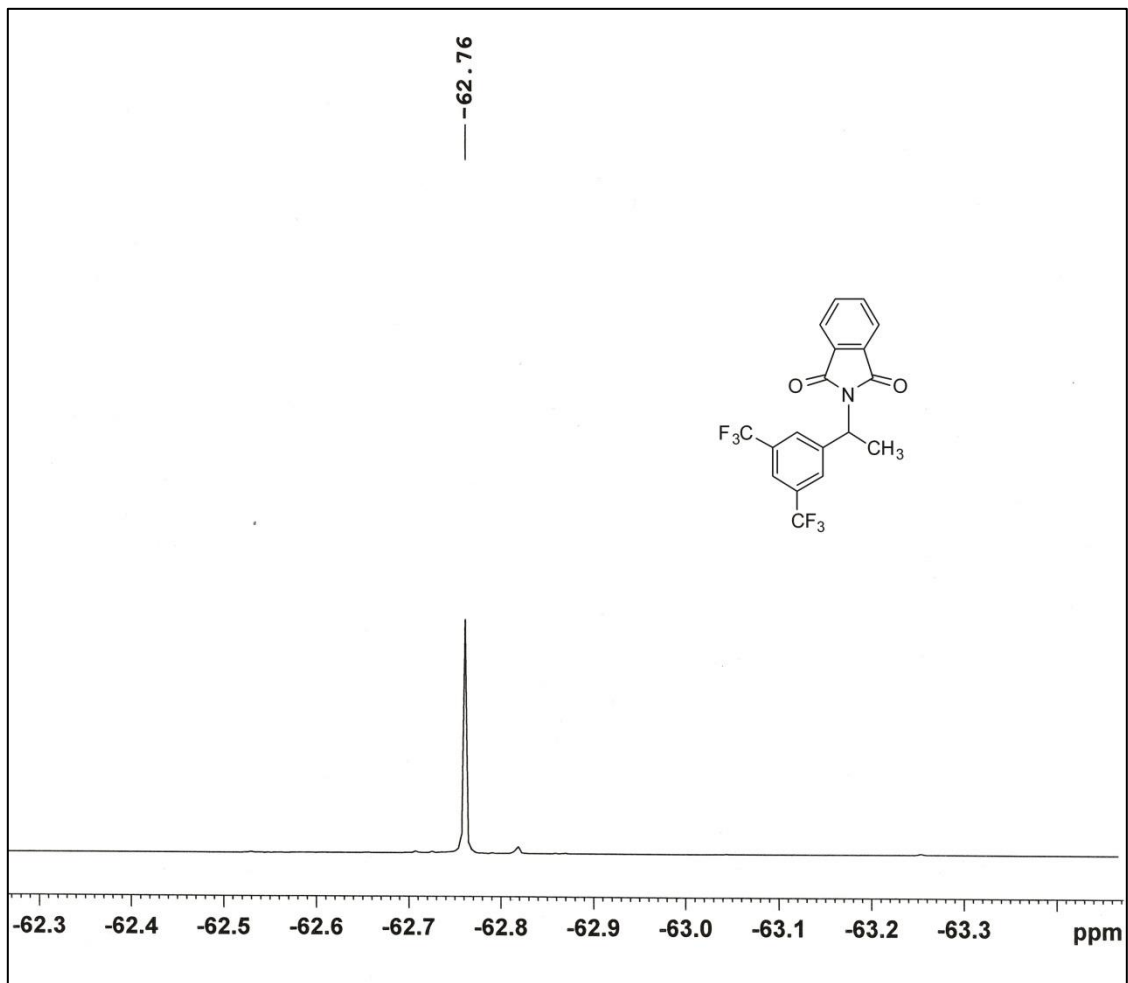

$^{19}\text{F}$ -NMR spectra of compound (S)-5 in  $\text{CDCl}_3$

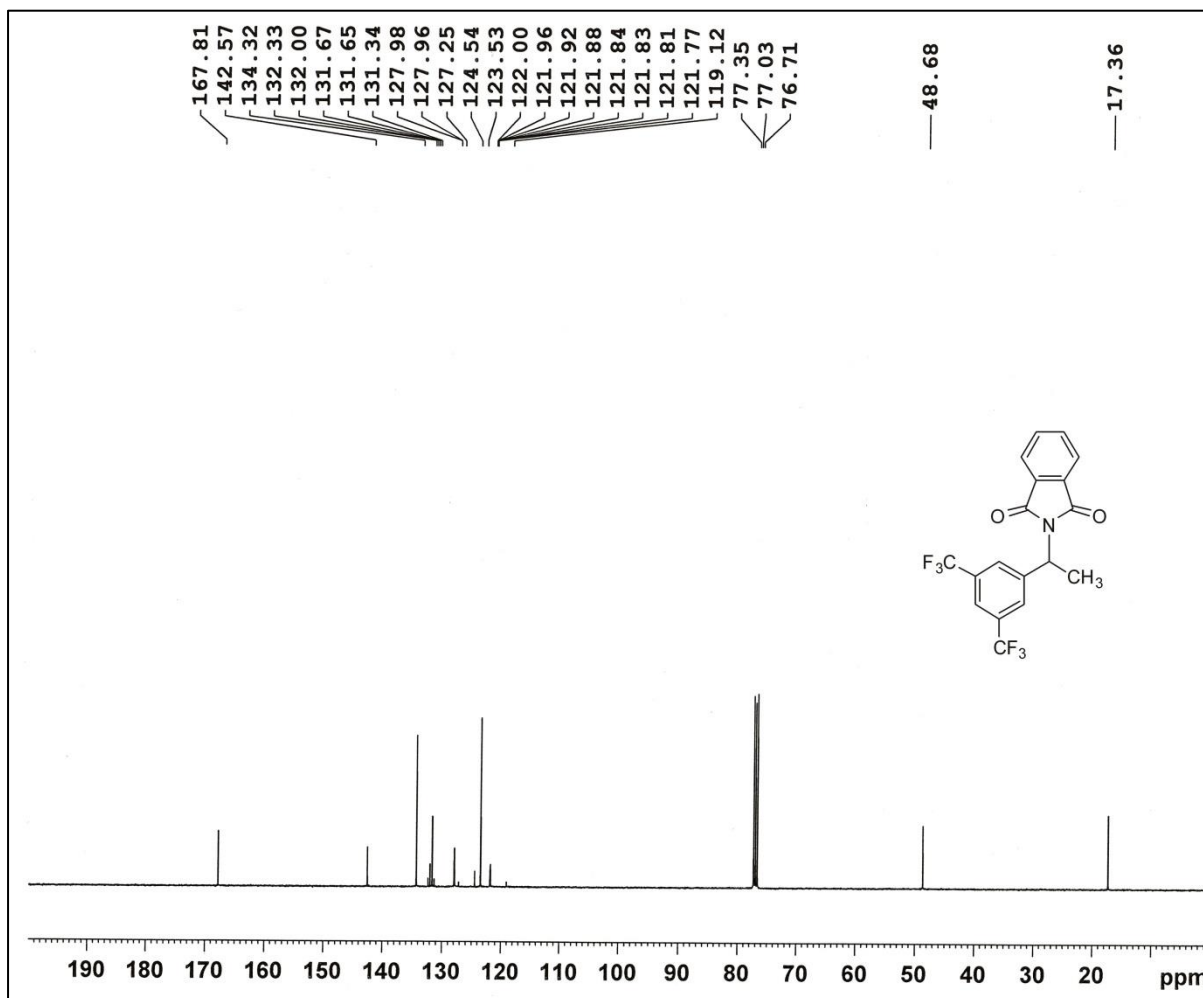

<sup>13</sup>C-NMR spectra of compound (S)-5 in CDCl<sub>3</sub>

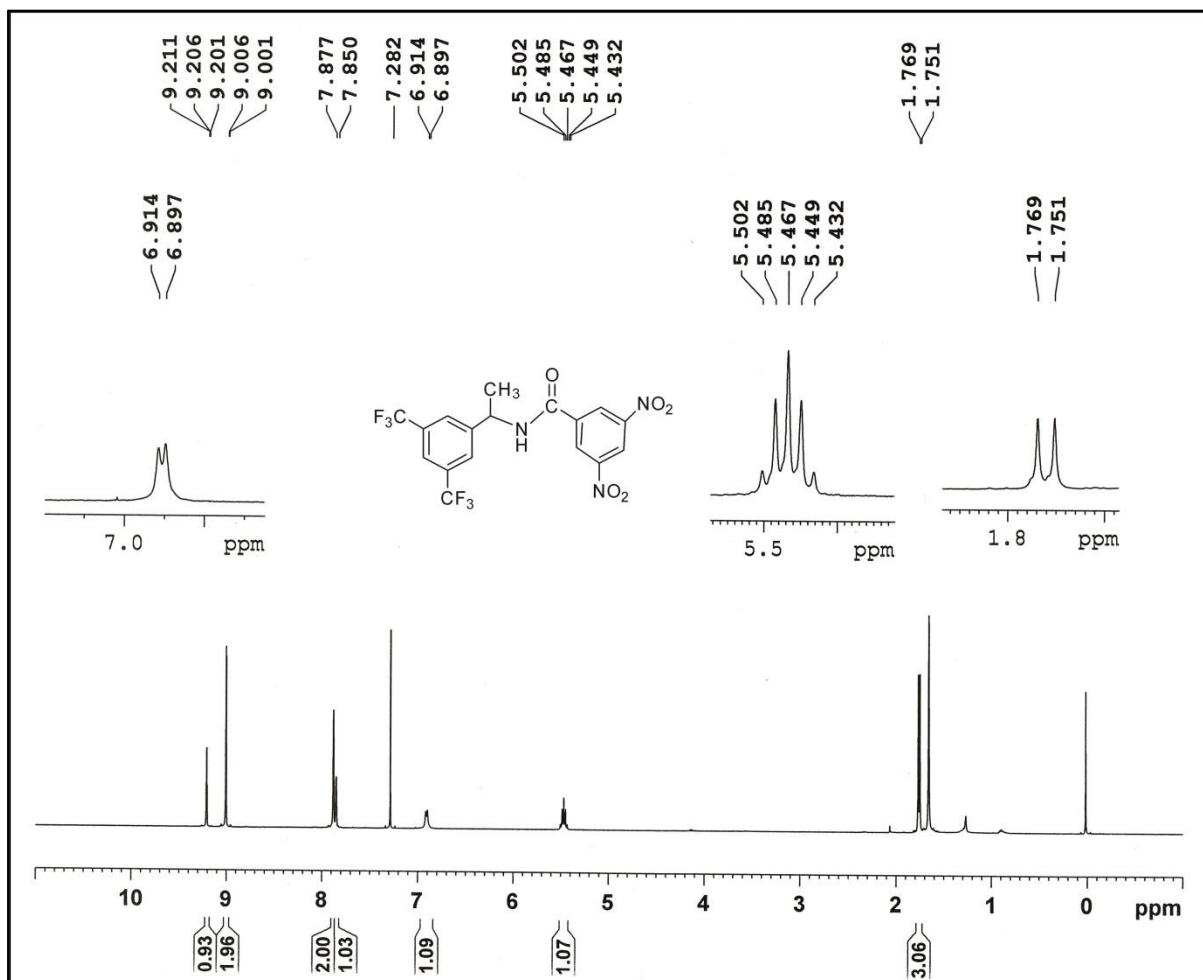

<sup>1</sup>H-NMR spectra of compound (S)-2 in CDCl<sub>3</sub>

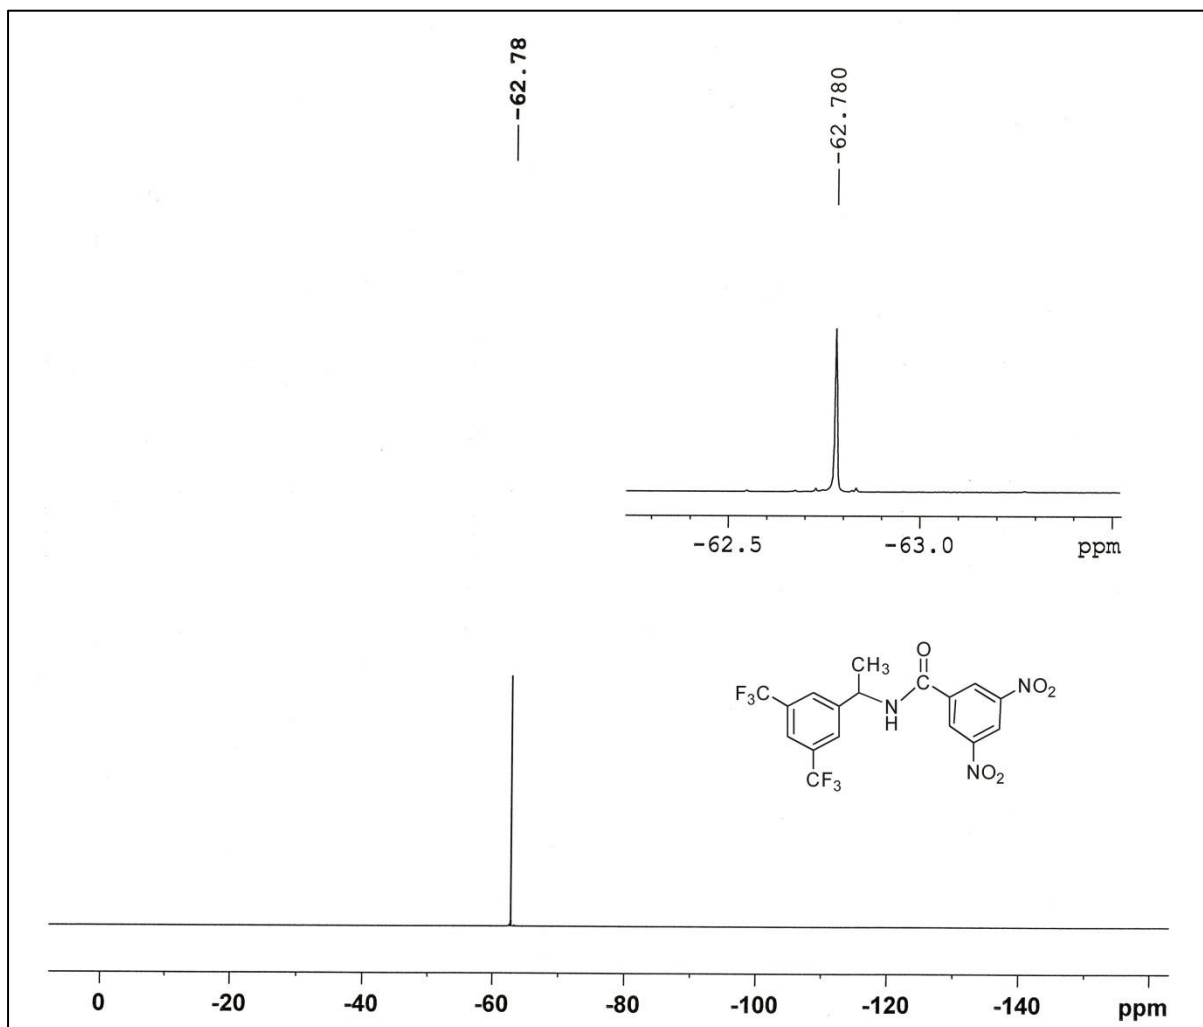

$^{19}\text{F}$ -NMR spectra of compound (S)-2 in  $\text{CDCl}_3$

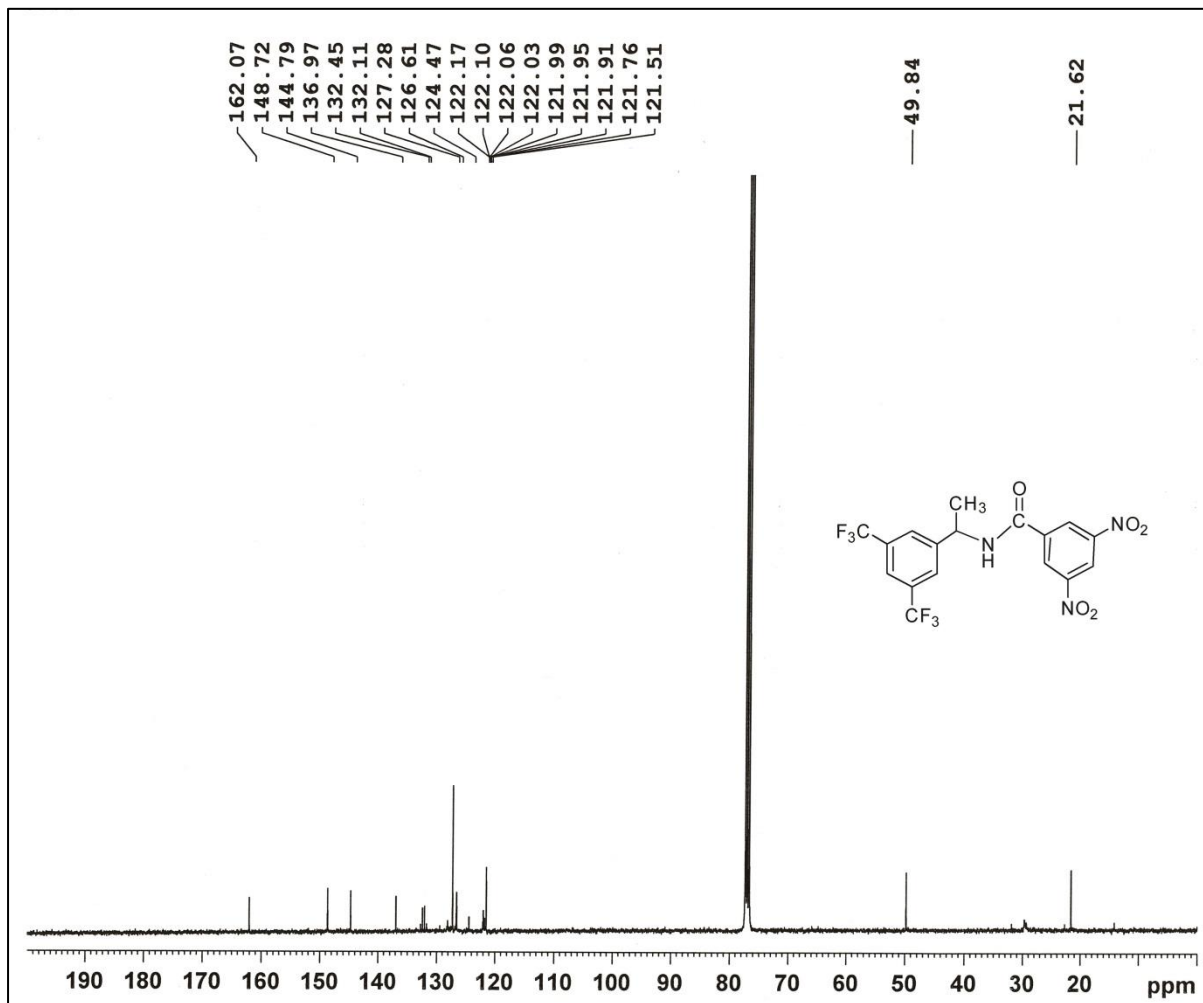

$^{13}\text{C}$ -NMR spectra of compound (*S*)-**2** in  $\text{CDCl}_3$

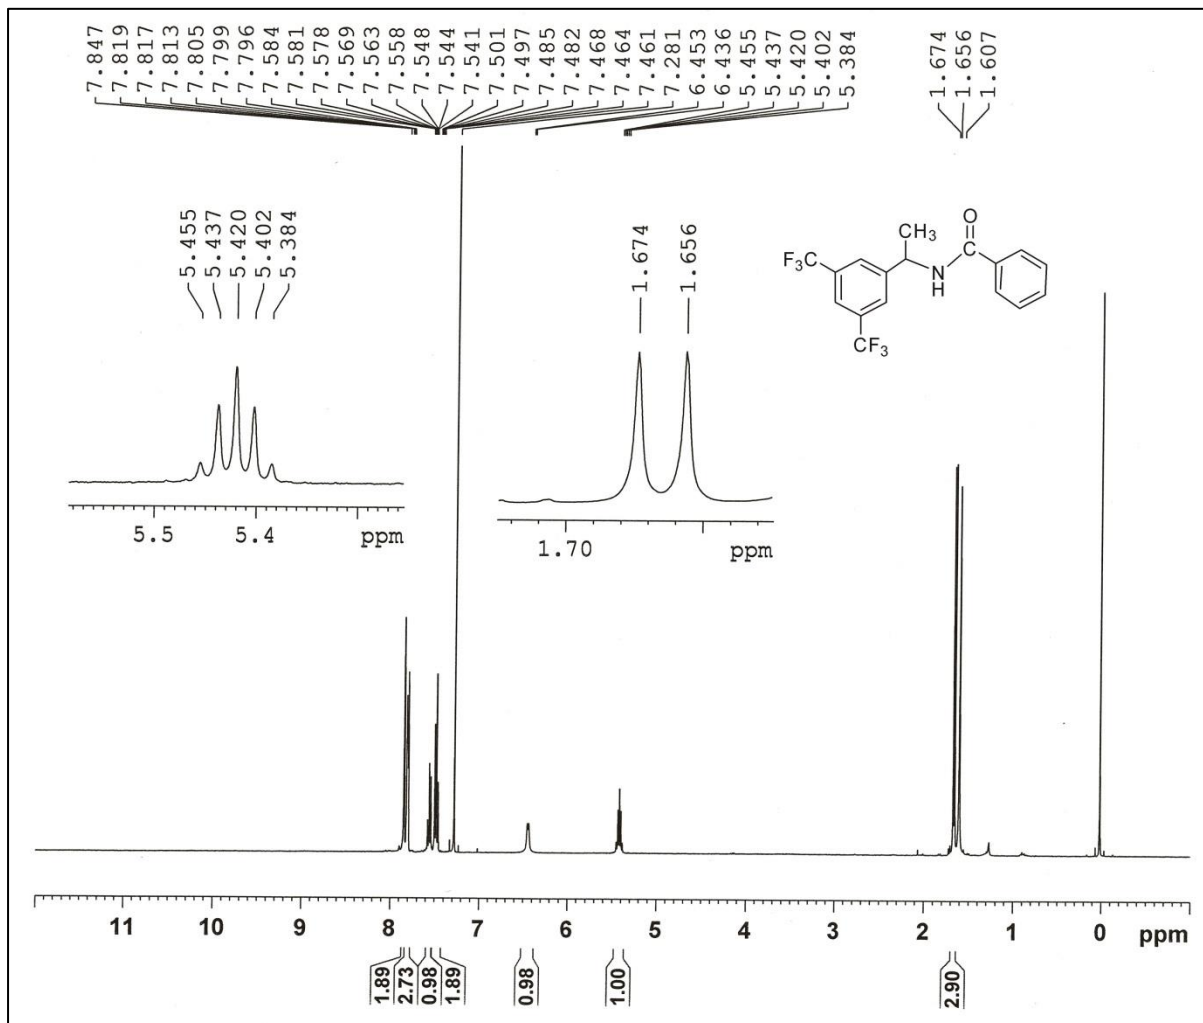

<sup>1</sup>H-NMR spectra of compound (S)-7 in CDCl<sub>3</sub>



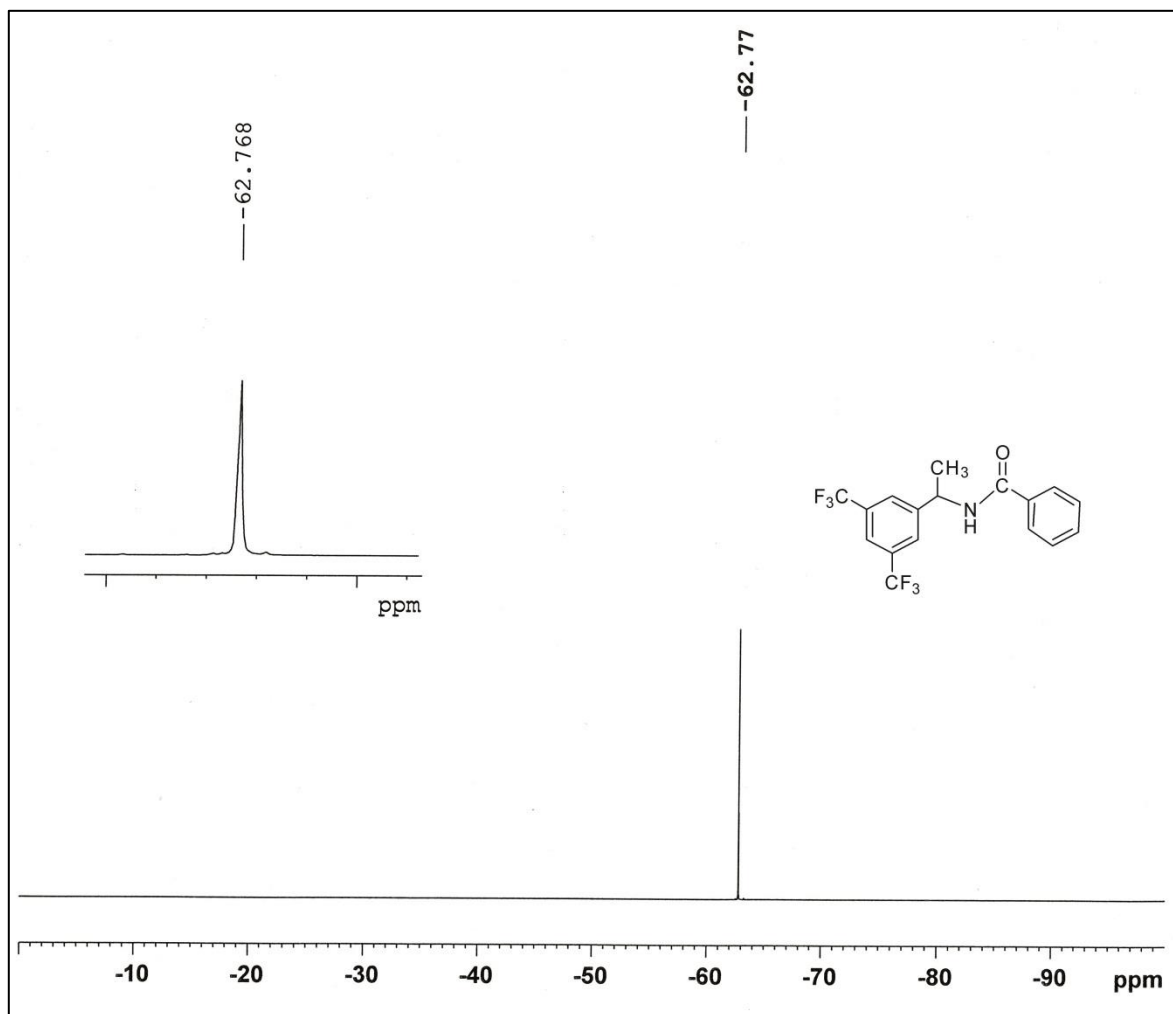

$^{19}\text{F}$ -NMR spectra of compound (S)-7 in  $\text{CDCl}_3$

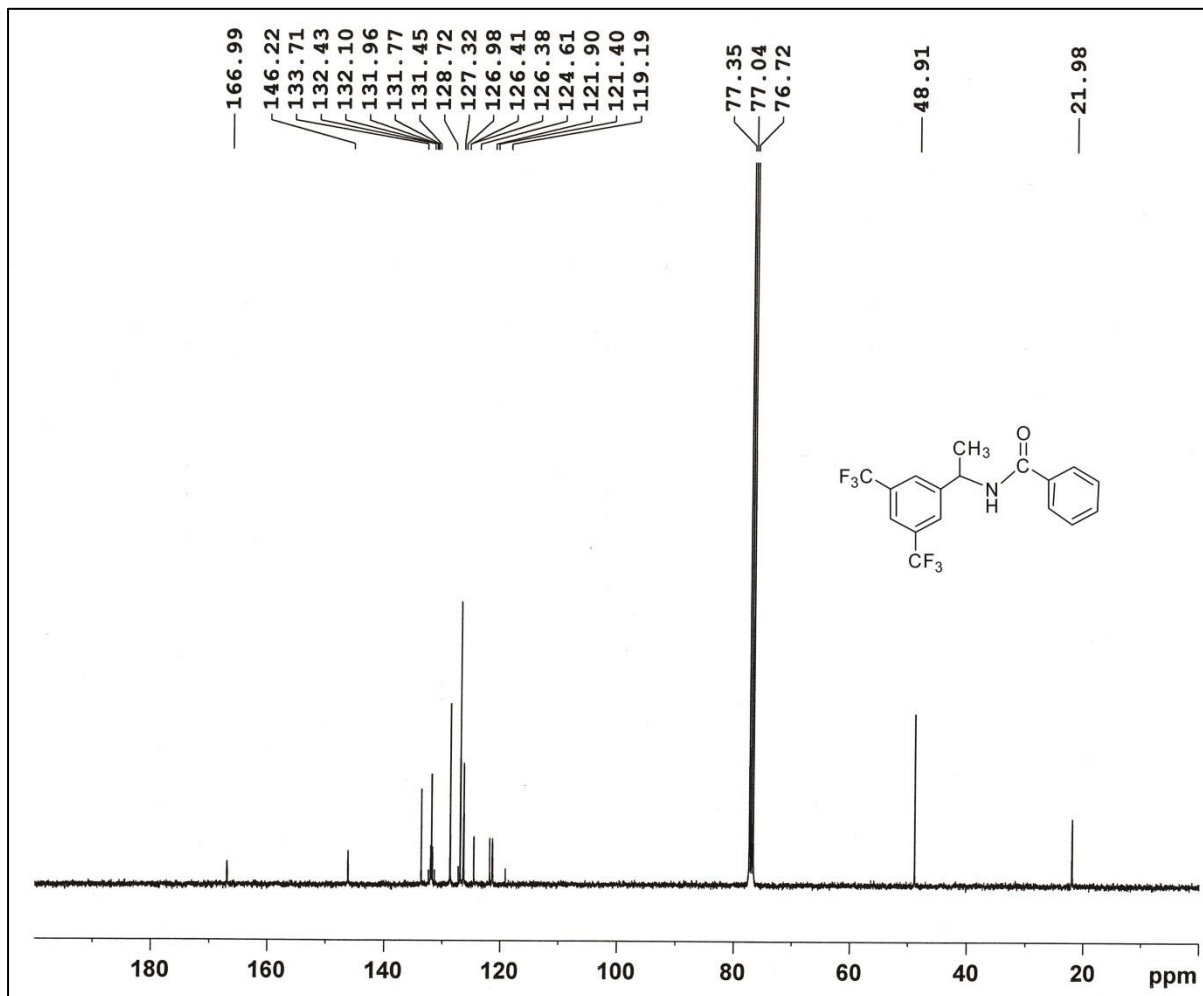

$^{13}\text{C}$ -NMR spectra of compound (S)-7 in  $\text{CDCl}_3$

## NMR spectra of CSA study

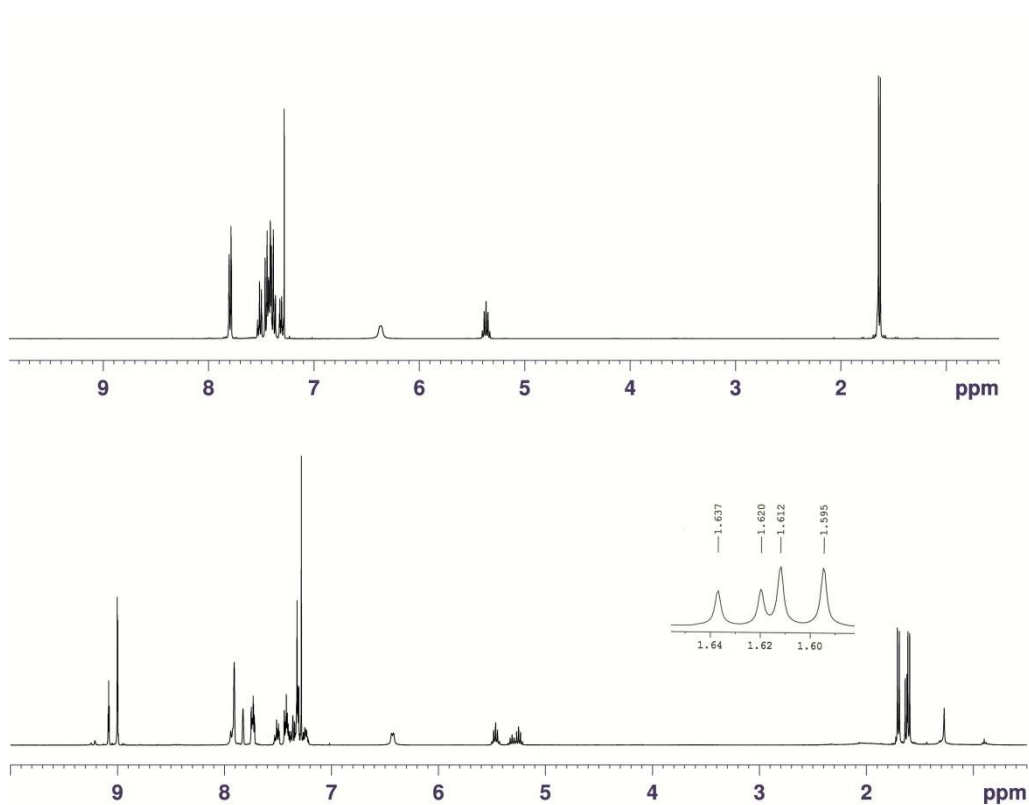

$^1\text{H-NMR}$  spectra of **8a** (*R:S* ratio, 1:2) [top], in presence of (*S*)-**2** [bottom] in  $\text{CDCl}_3$

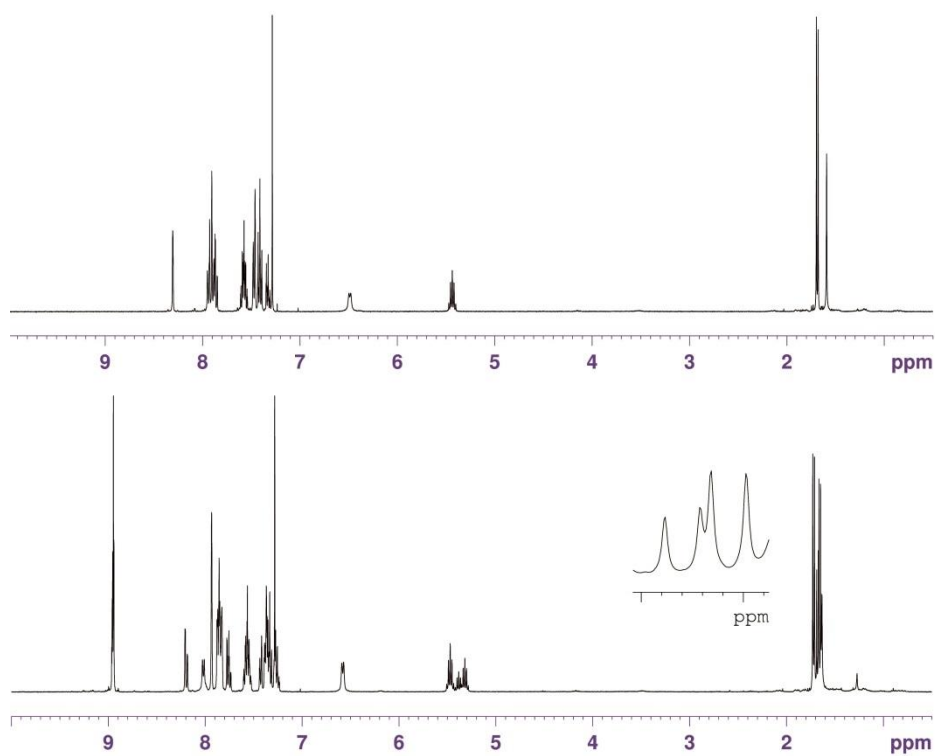

$^1\text{H-NMR}$  spectra of **8b** (*R:S* ratio, 1:2) [top], in presence of (*S*)-**2** [bottom] in  $\text{CDCl}_3$

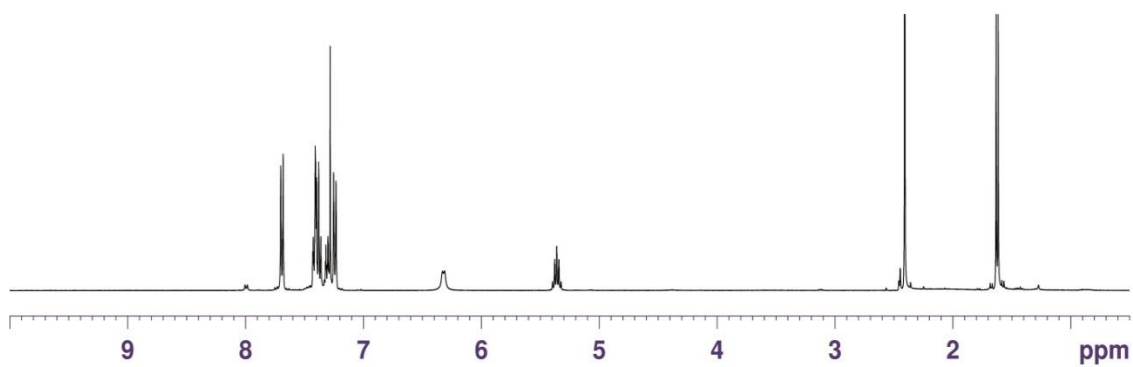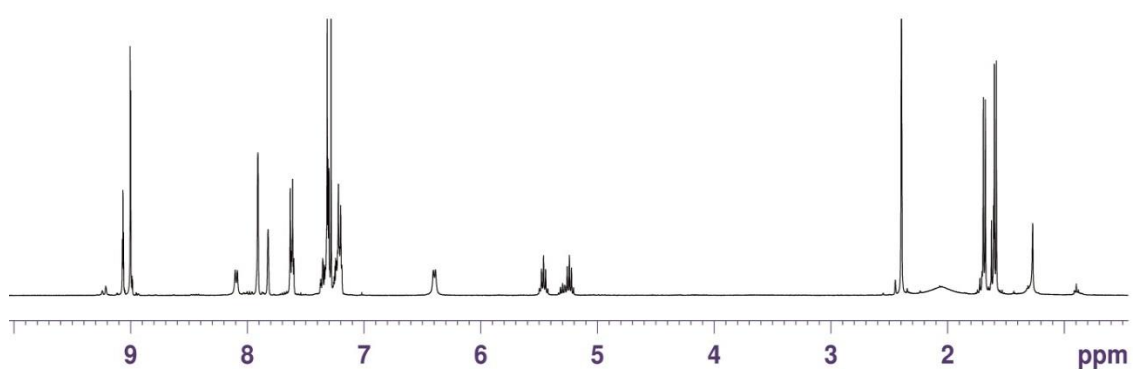

$^1\text{H-NMR}$  spectra of **8g** (*R:S* ratio, 1:2) [top], in presence of (*S*)-**2** [bottom] in  $\text{CDCl}_3$

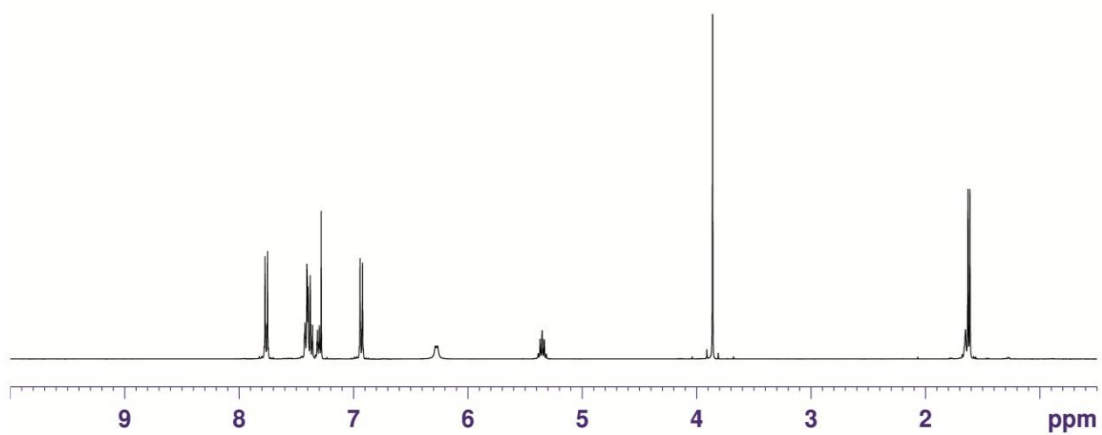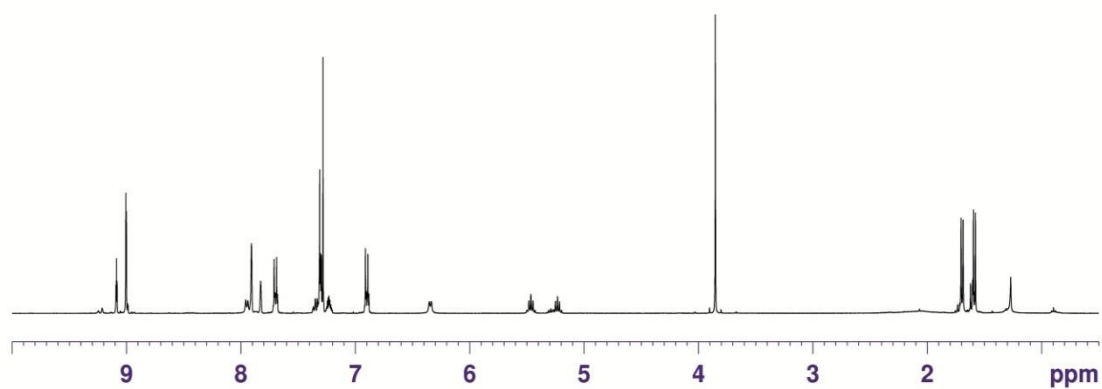

$^1\text{H-NMR}$  spectra of **8h** (*R:S* ratio, 1:2) [top], in presence of (*S*)-**2** [bottom] in  $\text{CDCl}_3$

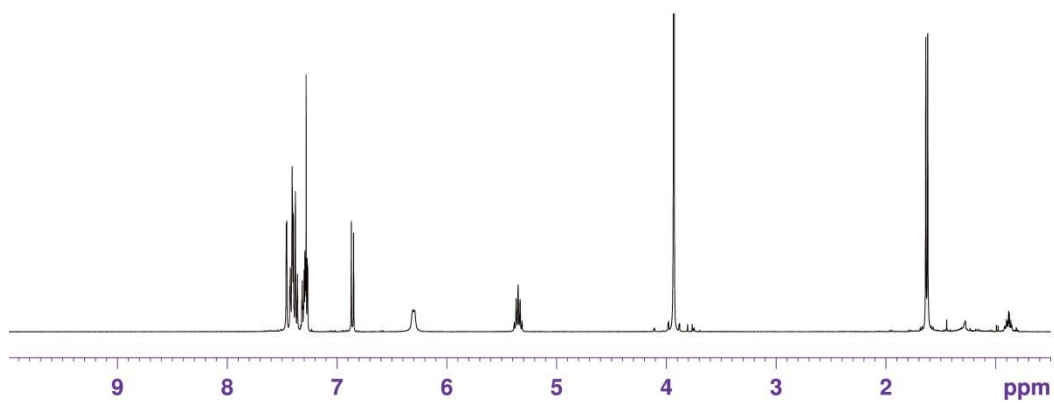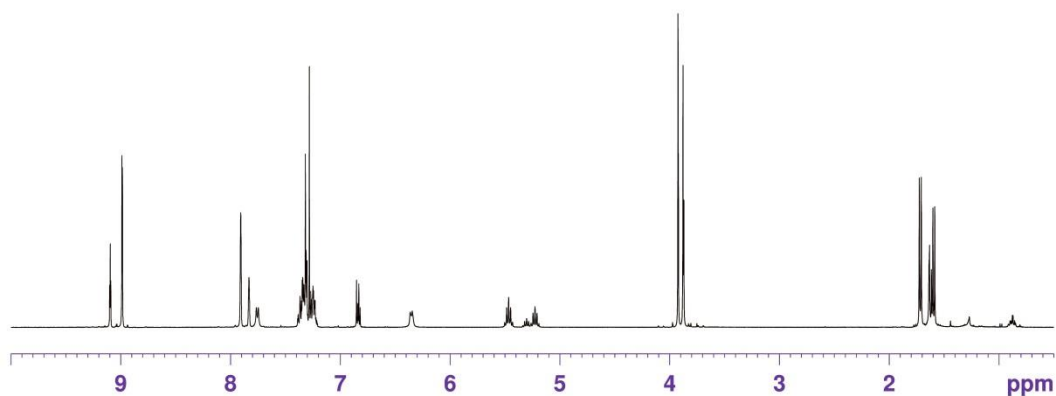

<sup>1</sup>H-NMR spectra of **8i** (*R:S* ratio, 1:2) [top], in presence of (*S*)-**2** [bottom] in CDCl<sub>3</sub>

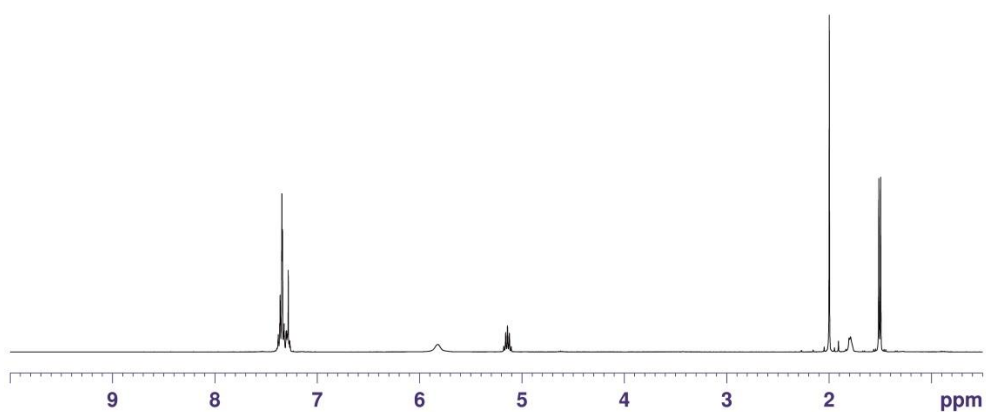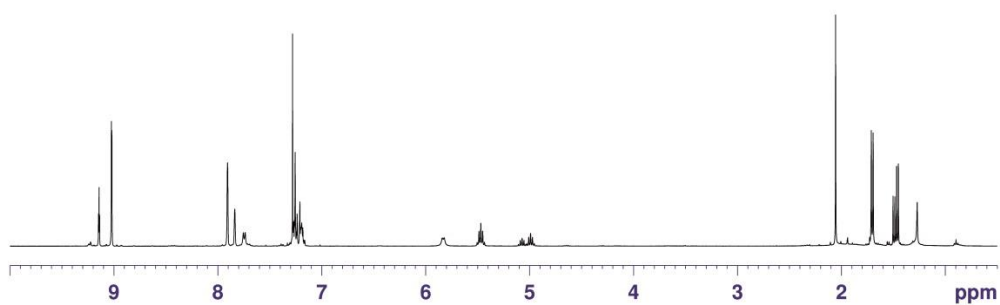

<sup>1</sup>H-NMR spectra of **8j** (*R:S* ratio, 1:2) [top], in presence of (*S*)-**2** [bottom] in CDCl<sub>3</sub>

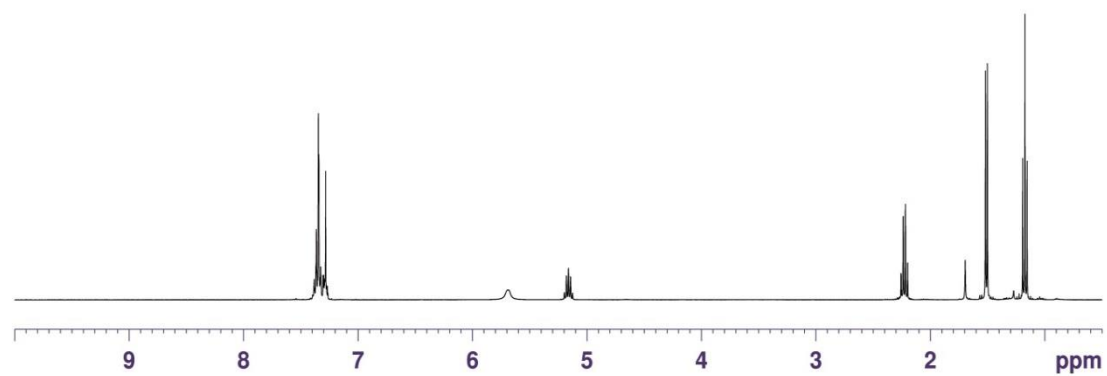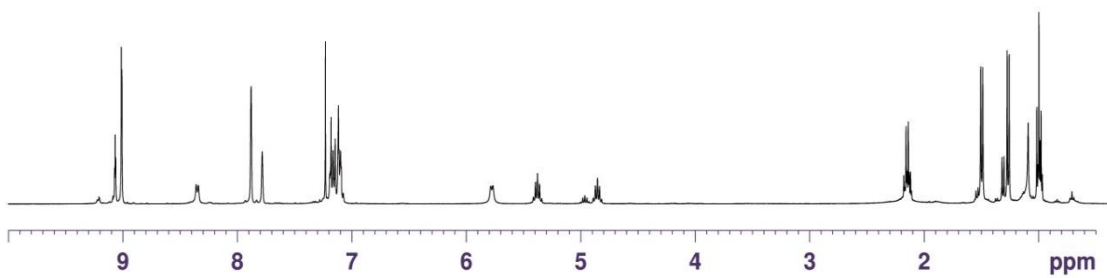

$^1\text{H-NMR}$  spectra of **8k** (*R:S* ratio, 1:3) [top], in presence of (*S*)-**2** [bottom] in  $\text{CDCl}_3$

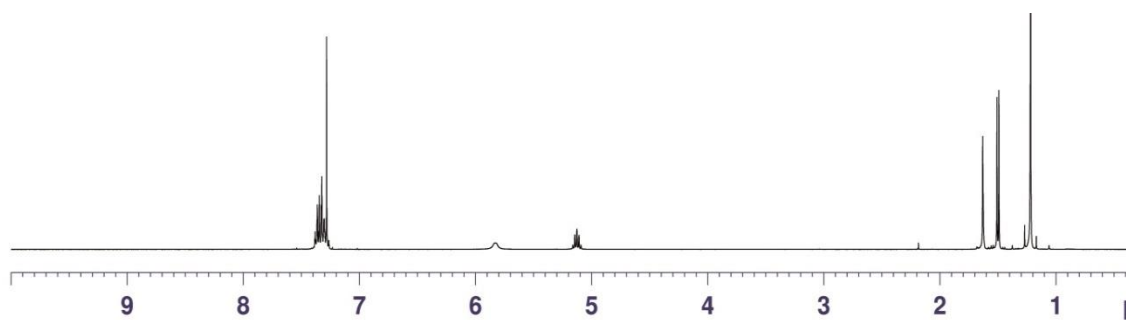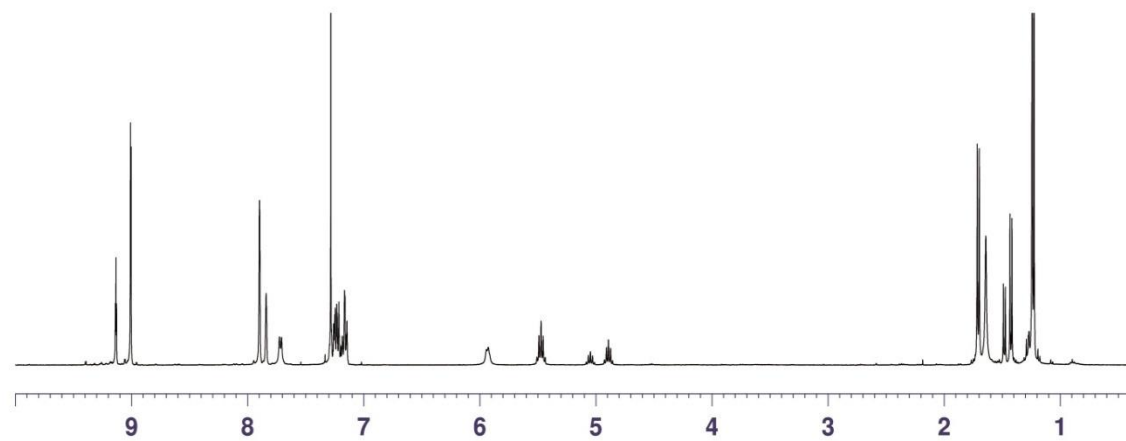

$^1\text{H-NMR}$  spectra of **8l** (*R:S* ratio, 1:2) [top], in presence of (*S*)-**2** [bottom] in  $\text{CDCl}_3$

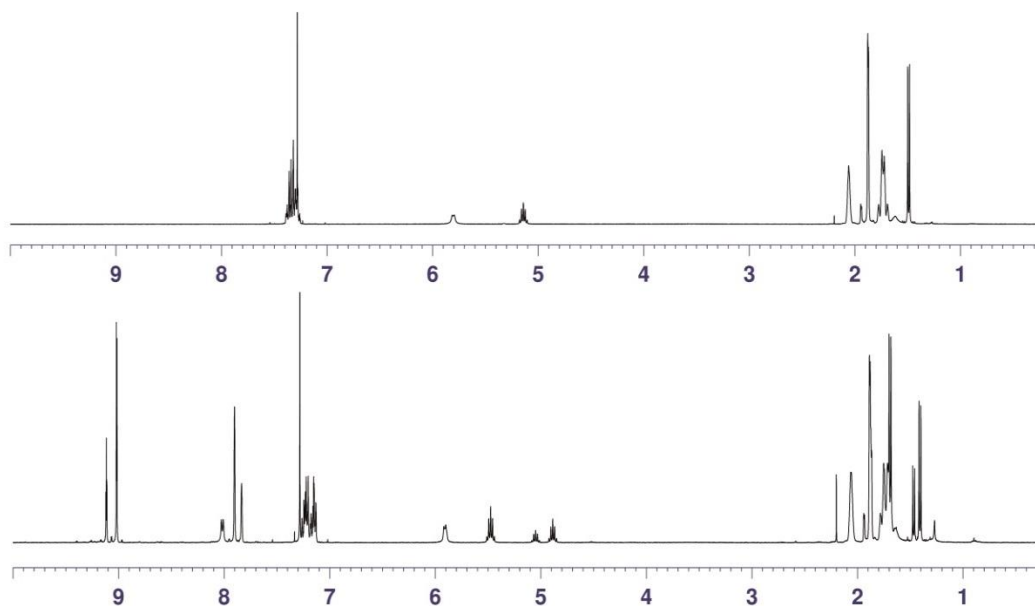

$^1\text{H-NMR}$  spectra of **8m** (*R:S* ratio, 1:2) [top], in presence of (*S*)-**2** [bottom] in  $\text{CDCl}_3$

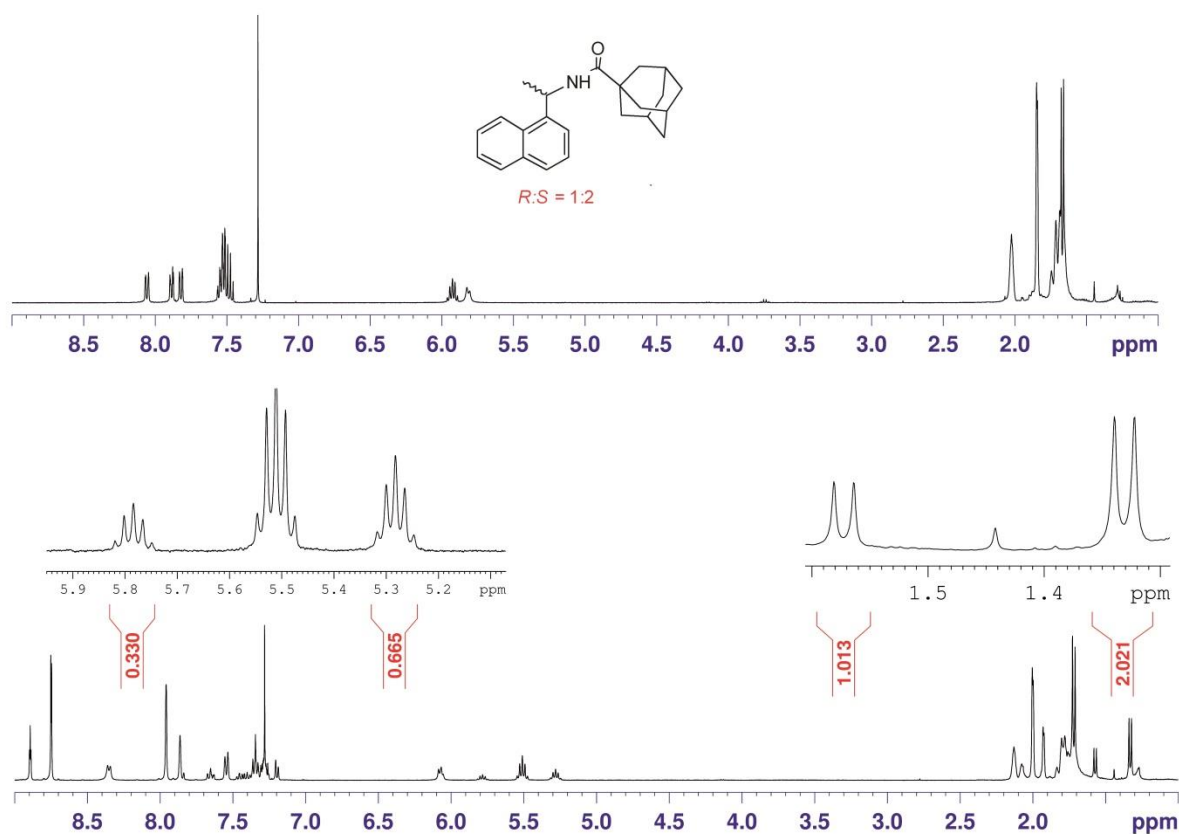

$^1\text{H-NMR}$  spectra of **8n** (*R:S* ratio, 1:2) in presence of (*S*)-**2** [bottom] in  $\text{CDCl}_3$

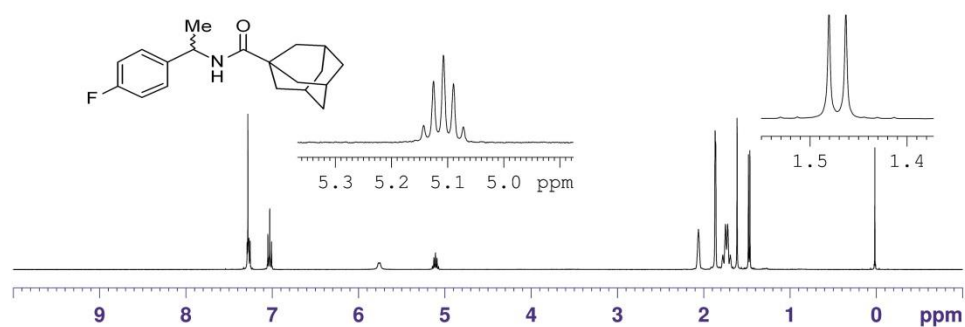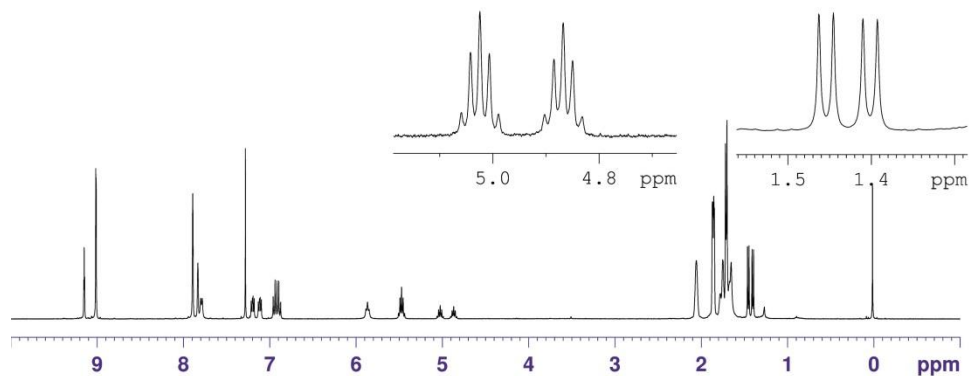

$^1\text{H-NMR}$  spectra of **80** [top], in presence of (*S*)-**2** [bottom] in  $\text{CDCl}_3$

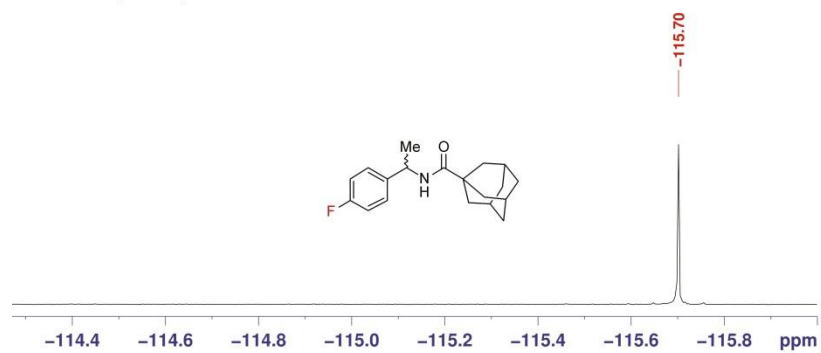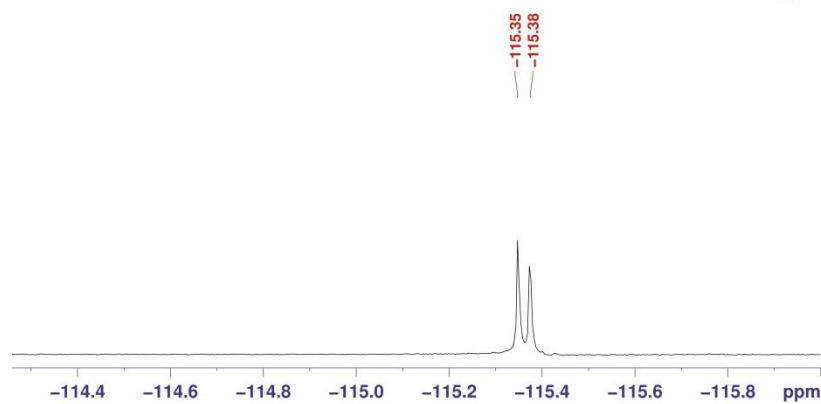

$^{19}\text{F-NMR}$  spectra of **80** [top], in presence of (*S*)-**2** [bottom] in  $\text{CDCl}_3$



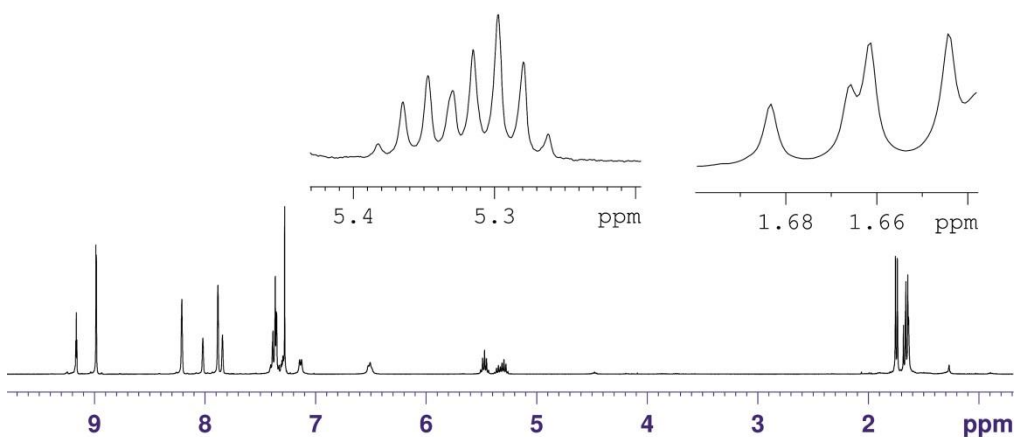

$^1\text{H-NMR}$  spectra of **8p** (*R:S* ratio, 1:2) in presence of (*S*)-**2** [bottom] in  $\text{CDCl}_3$

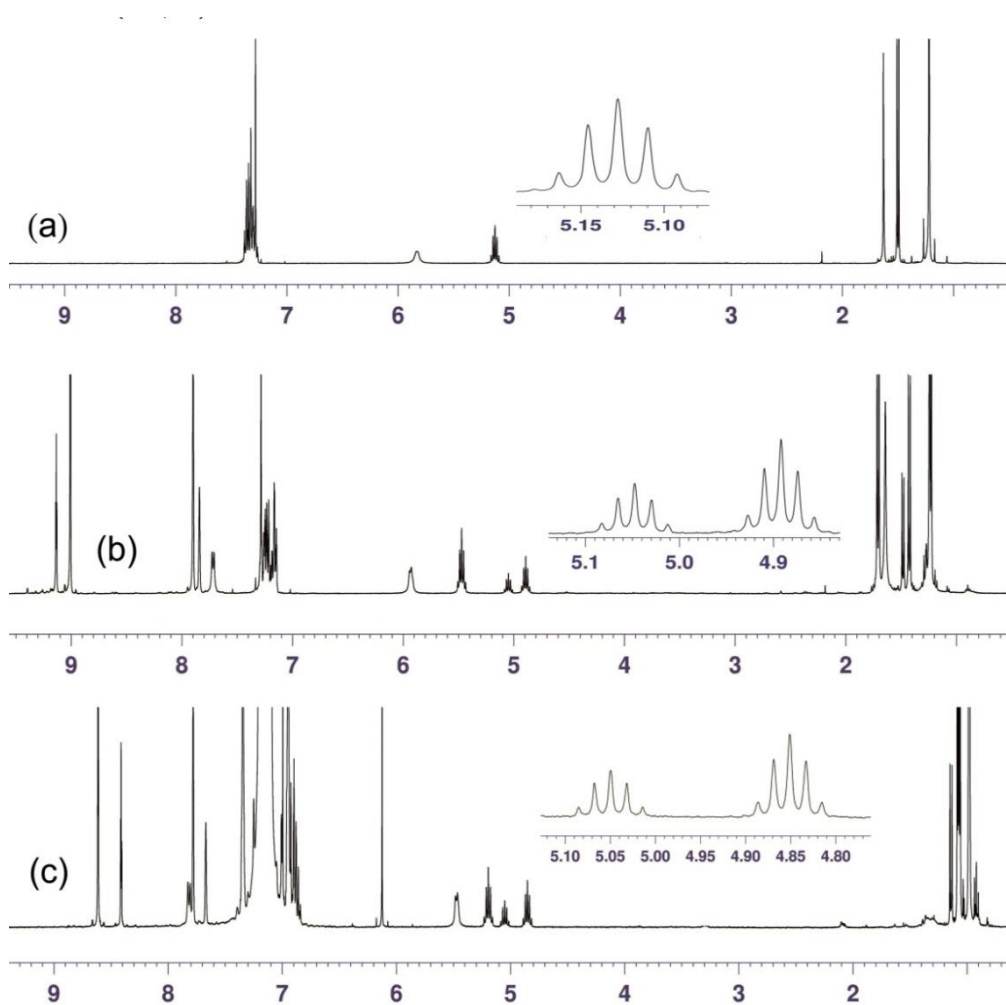

$^1\text{H-NMR}$  spectra of (a) blank **81** (b) in presence of (*S*)-**2** in  $\text{CDCl}_3$  (c) in presence of (*S*)-**2** in  $\text{C}_6\text{D}_6$

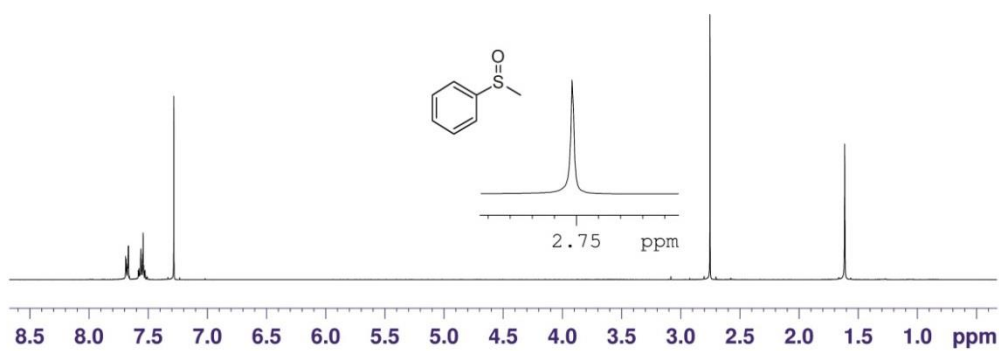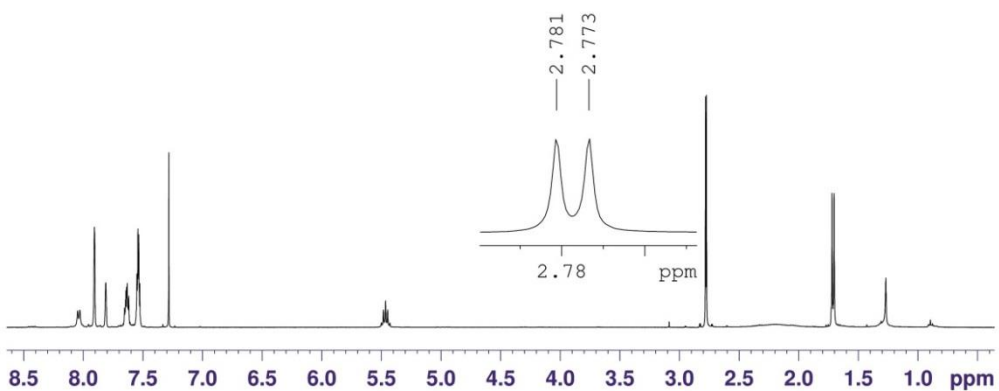

$^1\text{H-NMR}$  spectra of **9a** [top], in presence of (*S*)-**2** [bottom] in  $\text{CDCl}_3$

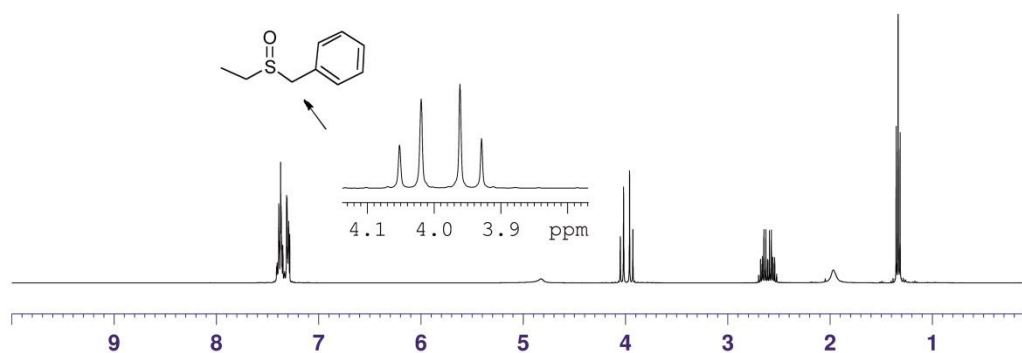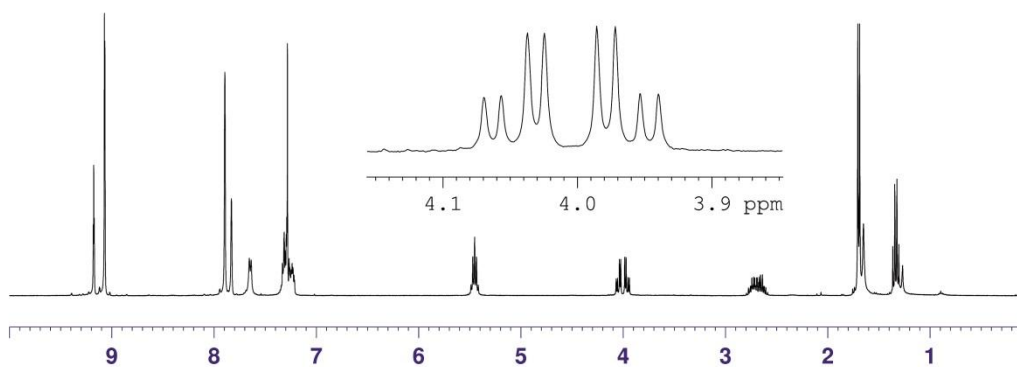

$^1\text{H-NMR}$  spectra of **9d** [top], in presence of (*S*)-**2** [bottom] in  $\text{CDCl}_3$

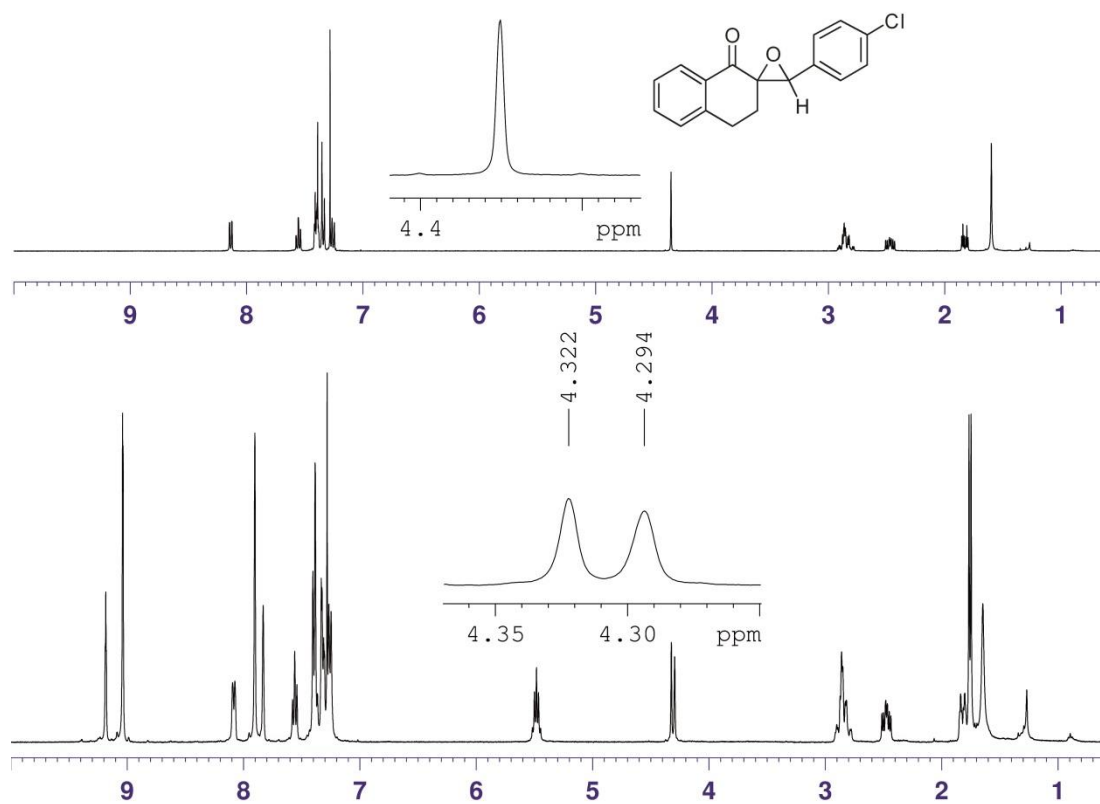

$^1\text{H-NMR}$  spectra of **10b** [top], in presence of (*S*)-**2** [bottom] in  $\text{CDCl}_3$

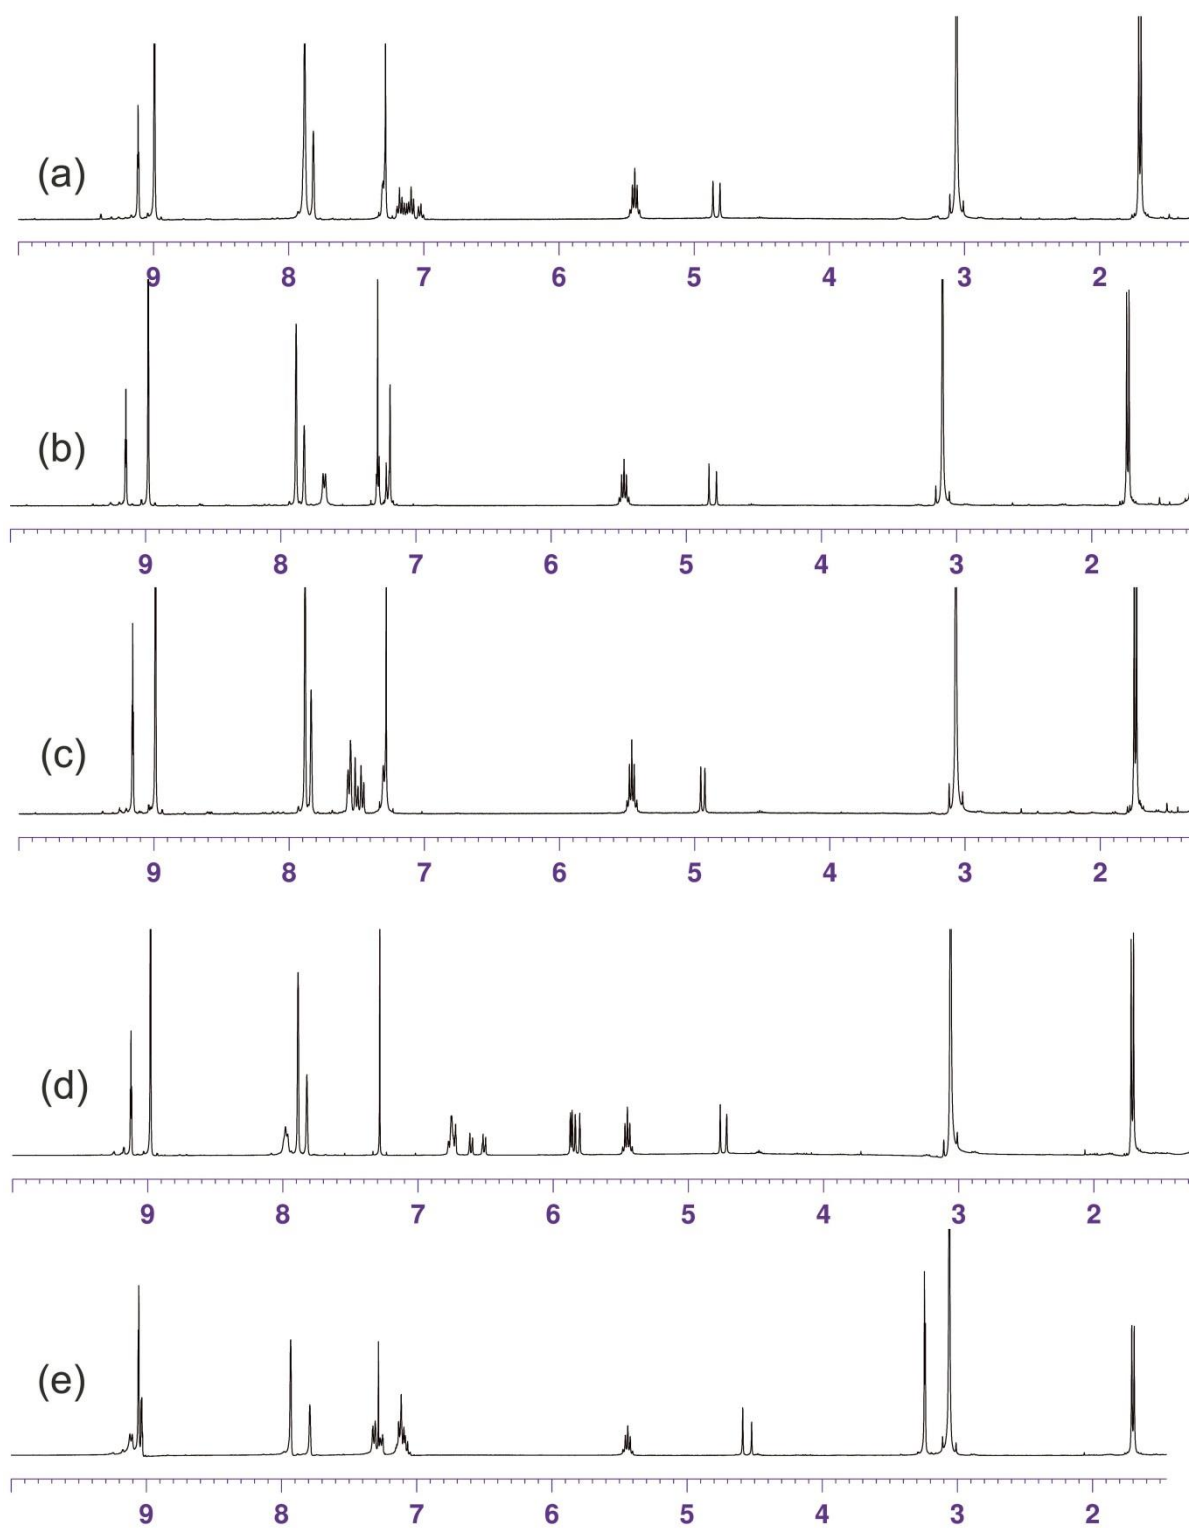

$^1\text{H-NMR}$  spectra in presence of (*S*)-**2** & DABCO in  $\text{CDCl}_3$  (a) with **11a** (b) **11b** (c) **11c** (d) **11d** (e) **11e**

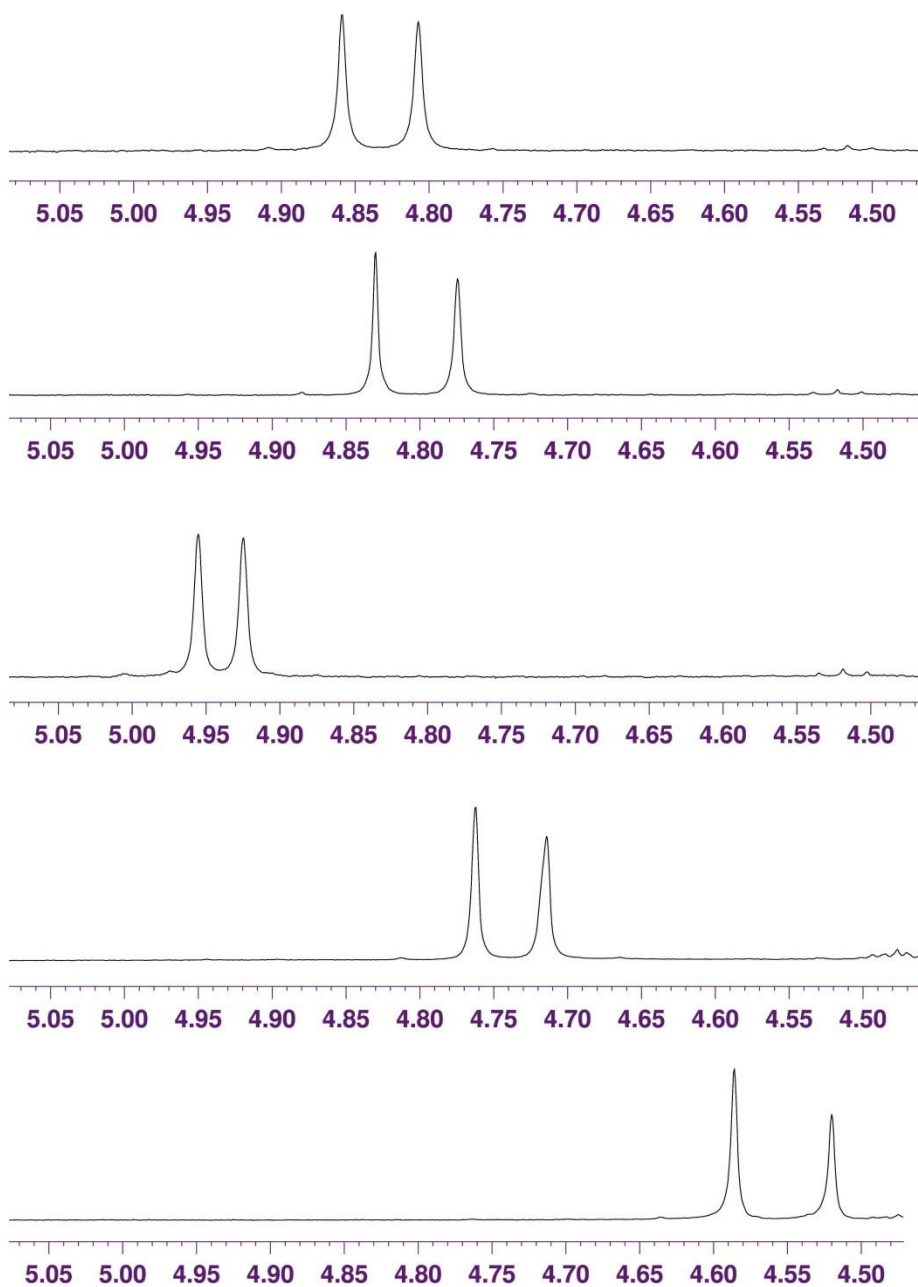

Selected region of  $^1\text{H-NMR}$  spectra in presence of (*S*)-**2** & DABCO in  $\text{CDCl}_3$  (**a**) with **11a** (b) **11b** (c) **11c** (d) **11d** (e) **11e**

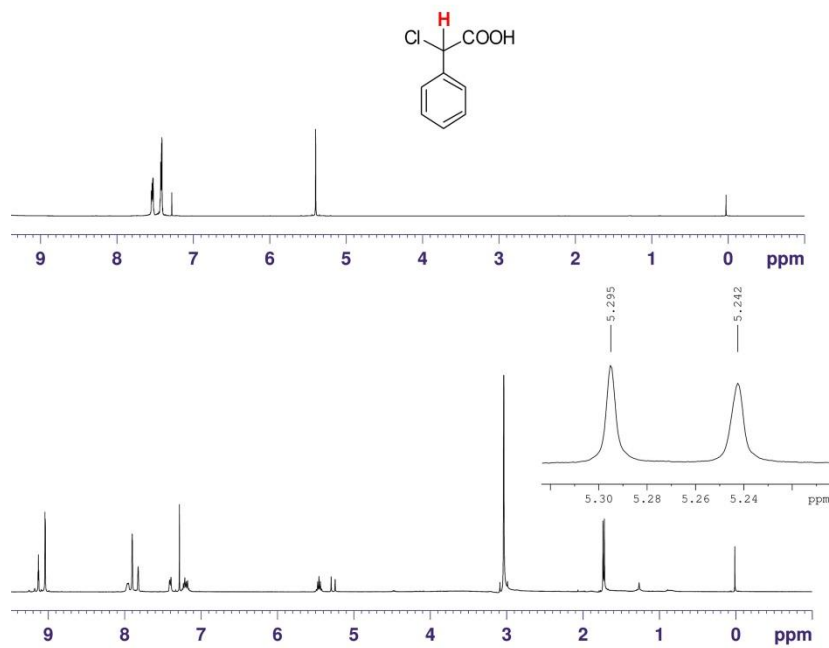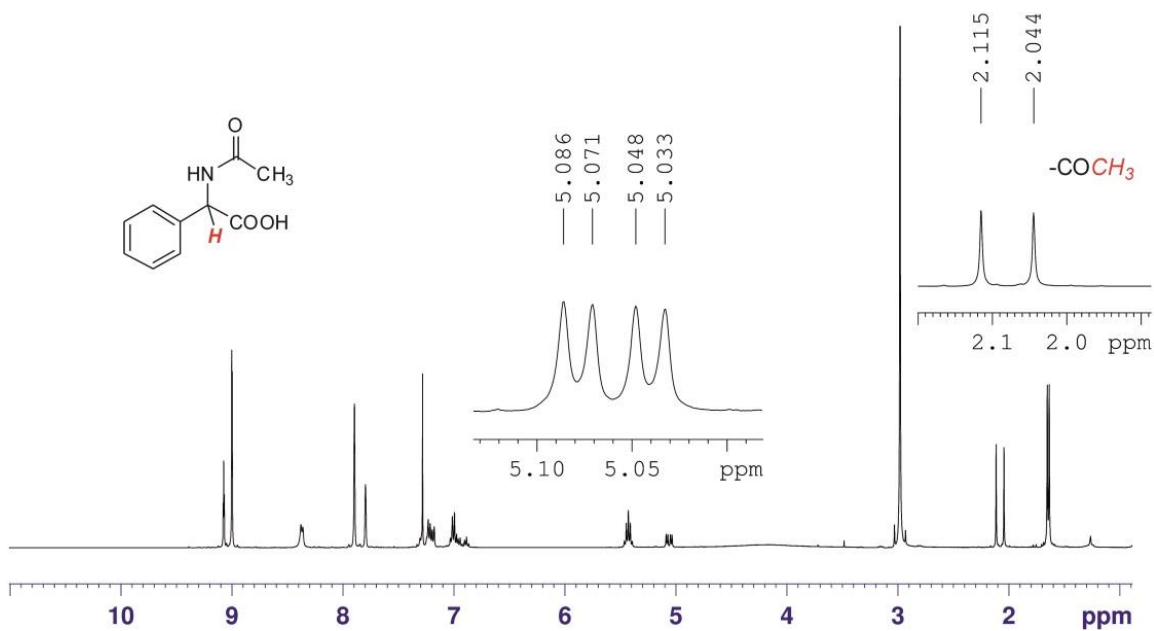

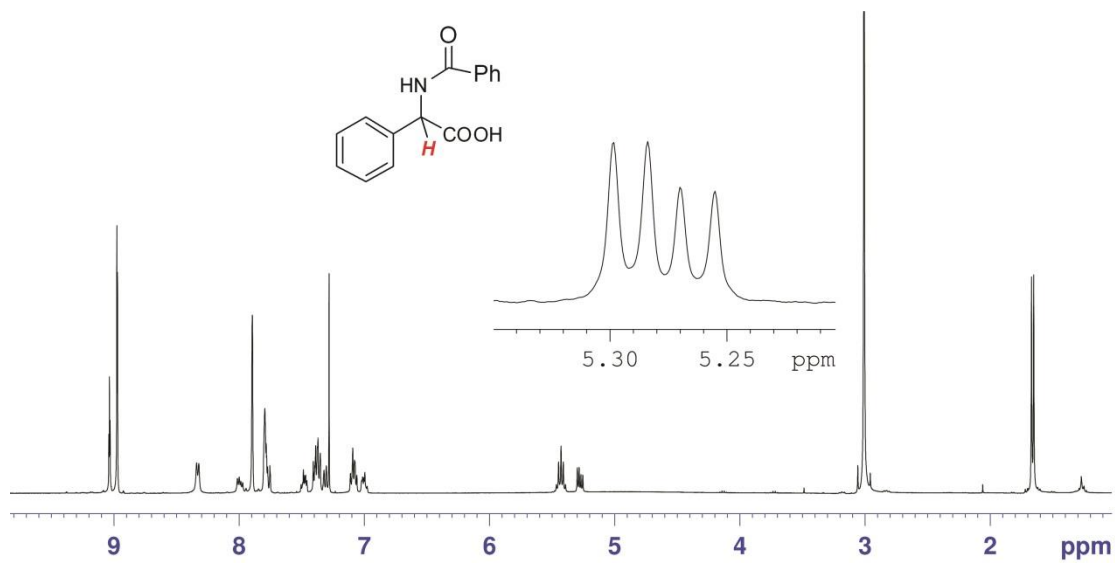

$^1\text{H-NMR}$  spectra of **12b** (10% excess in D isomer) in presence of (*S*)-**2** in  $\text{CDCl}_3$

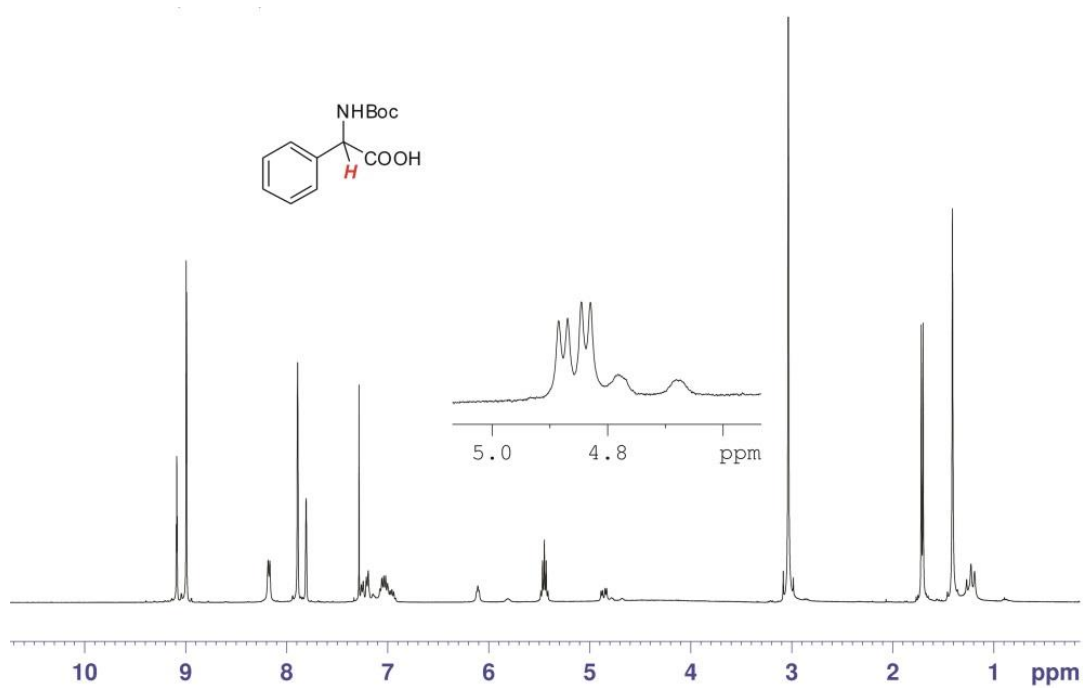

$^1\text{H-NMR}$  spectra of **12c** in presence of (*S*)-**2** in  $\text{CDCl}_3$

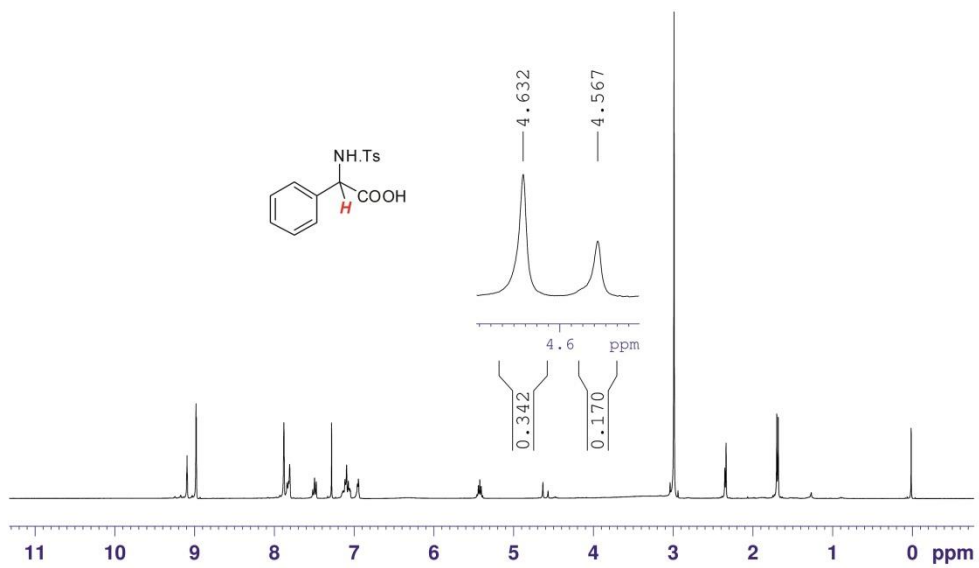

<sup>1</sup>H-NMR spectra of **12d** [D:L Ratio 2:1] in presence of (*S*)-**2** in CDCl<sub>3</sub>

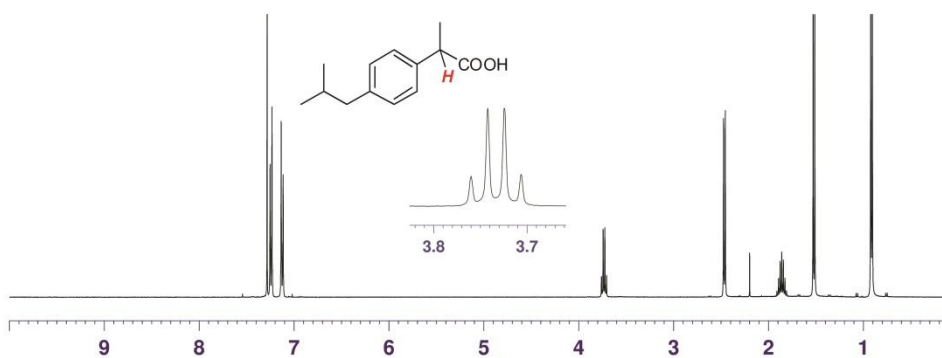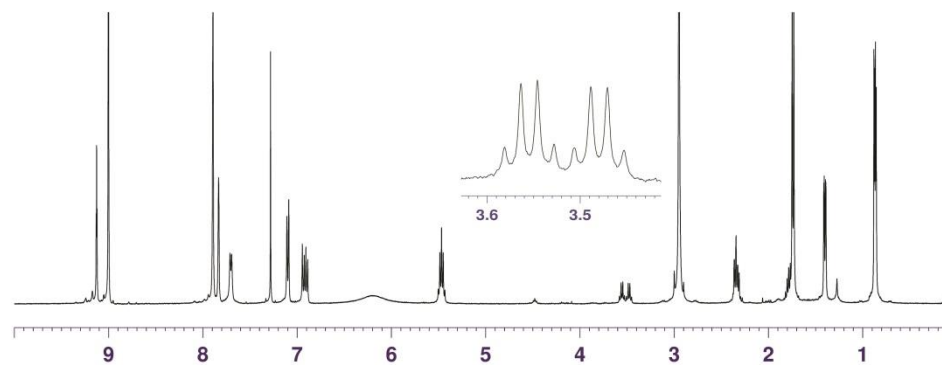

<sup>1</sup>H-NMR spectra of **13a** [top], in presence of (*S*)-**2** [bottom] in CDCl<sub>3</sub>



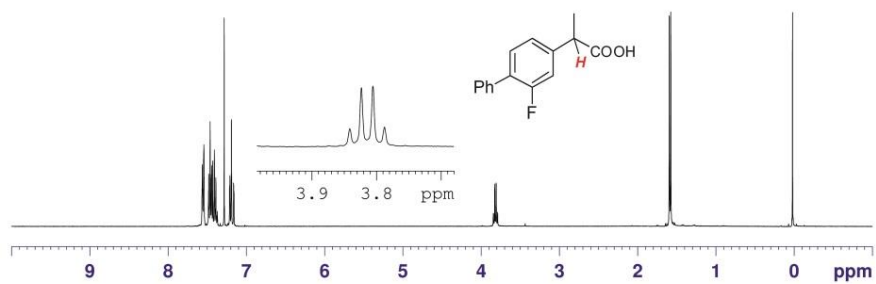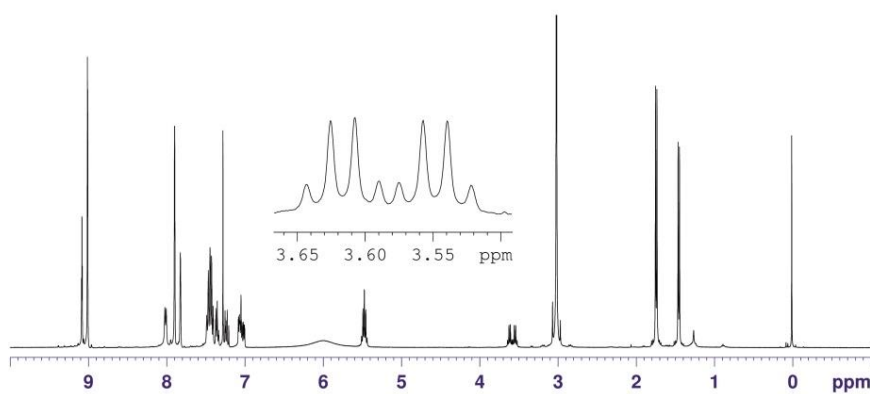

$^1\text{H-NMR}$  spectra of **13e** [top], in presence of (*S*)-**2** [bottom] in  $\text{CDCl}_3$

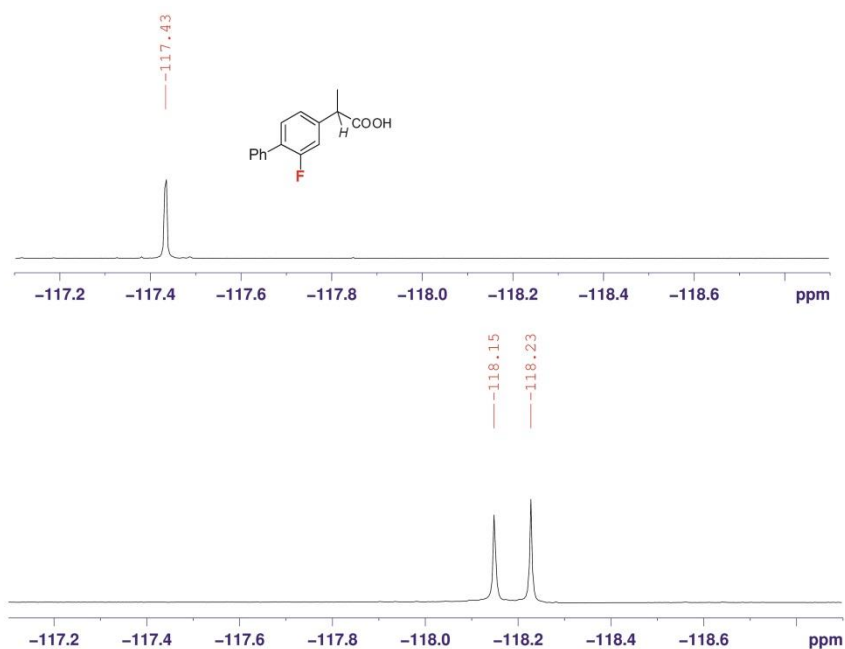

Selected region of  $^{19}\text{F-NMR}$  spectra of **13e** [top], in presence of (*S*)-**2** [bottom] in  $\text{CDCl}_3$

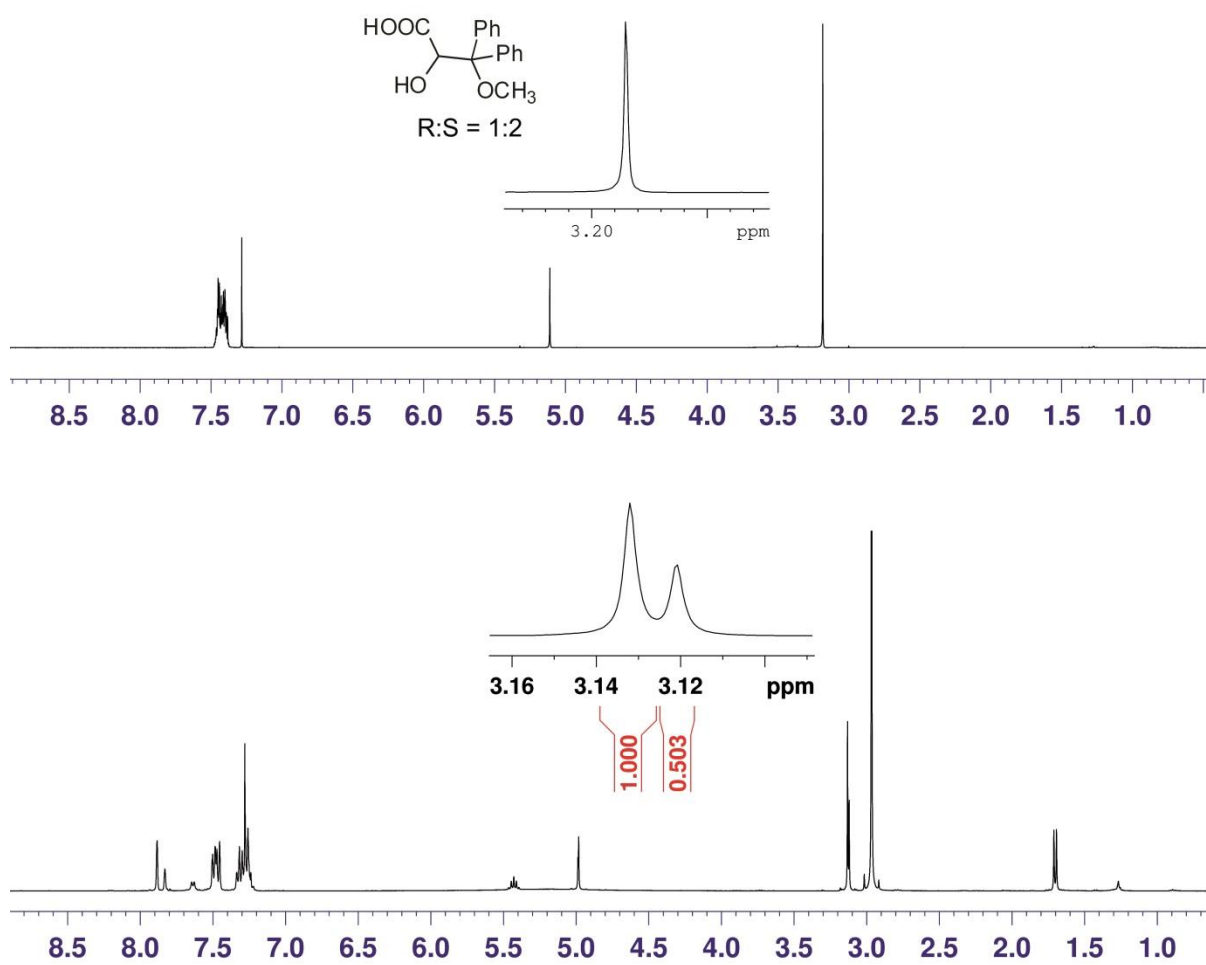

$^1\text{H-NMR}$  spectra of **13d** ( $R:S$  ratio 1:2) [top], in presence of ( $S$ )-**2** [bottom] in  $\text{CDCl}_3$

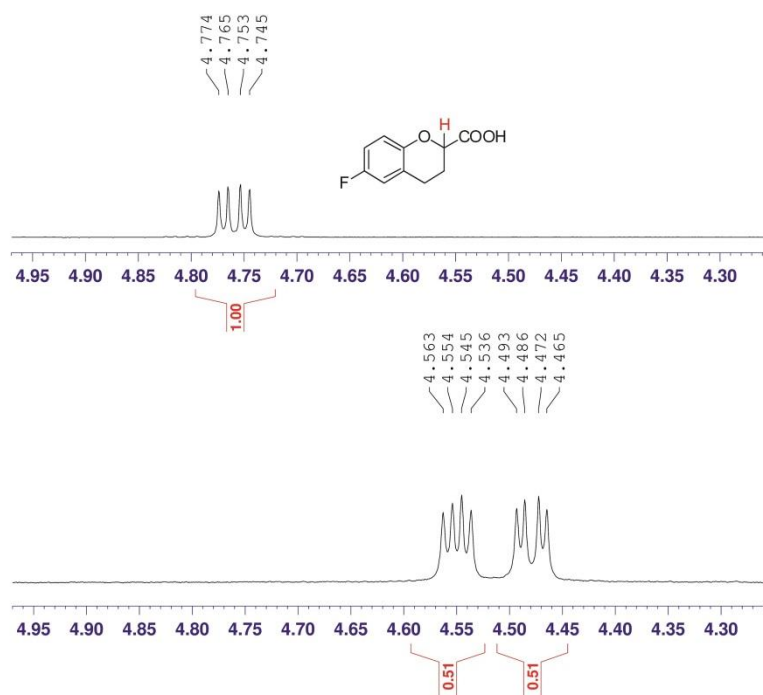

Selected region of  $^1\text{H}$ -NMR spectra of **13f** [top], in presence of (*S*)-**2** [bottom] in  $\text{CDCl}_3$

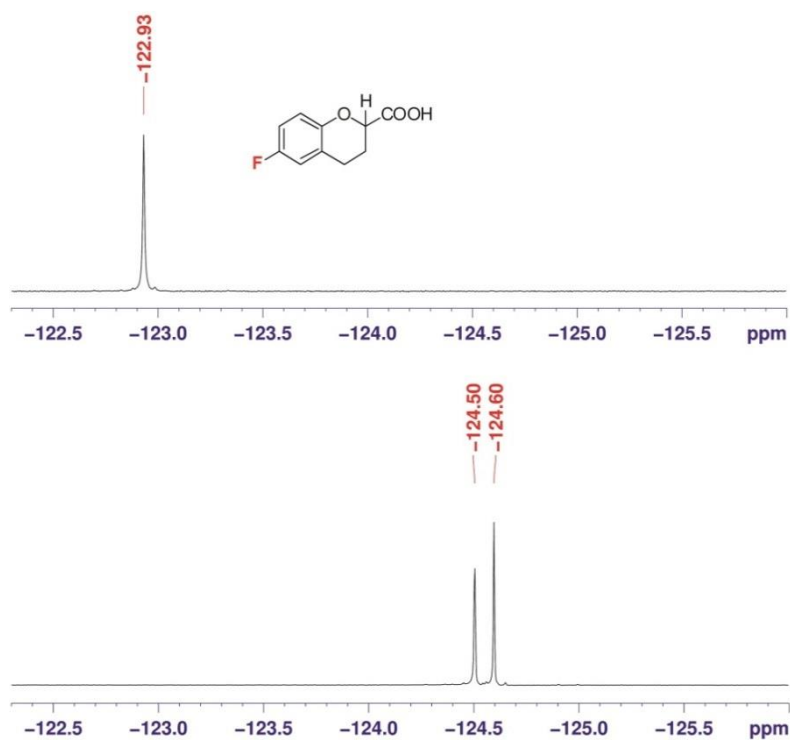

Selected region of  $^{19}\text{F}$ -NMR spectra of **13f** [top], in presence of (*S*)-**2** [bottom] in  $\text{CDCl}_3$

# Crystal data CCDC NO 1042105

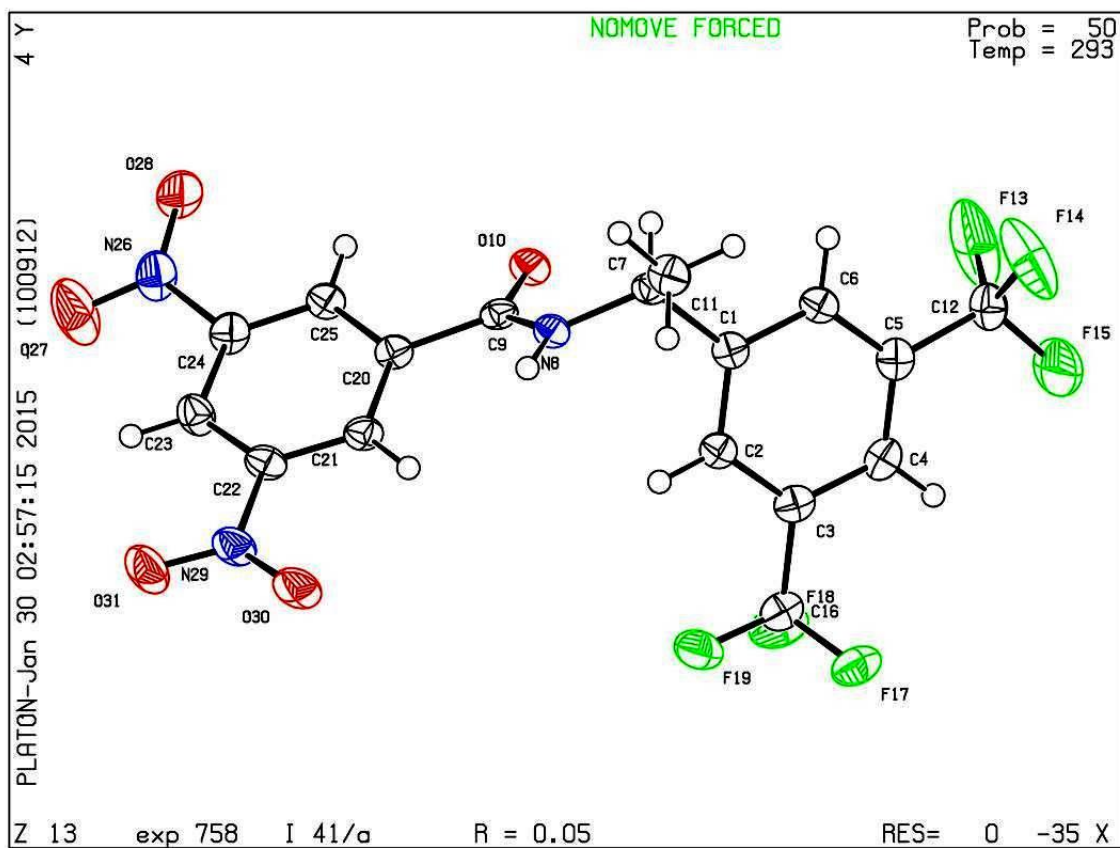

**Table 1 Crystal data and structure refinement**

|                                             |                                                                              |
|---------------------------------------------|------------------------------------------------------------------------------|
| Empirical formula                           | C <sub>17</sub> H <sub>11</sub> F <sub>6</sub> N <sub>3</sub> O <sub>5</sub> |
| Formula weight                              | 451.29                                                                       |
| Temperature/K                               | 134(8)                                                                       |
| Crystal system                              | Tetragonal                                                                   |
| Space group                                 | I4 <sub>1</sub> /a                                                           |
| a/Å                                         | 19.6845(3)                                                                   |
| b/Å                                         | 19.6845(3)                                                                   |
| c/Å                                         | 19.3124(3)                                                                   |
| α/°                                         | 90.00                                                                        |
| β/°                                         | 90.00                                                                        |
| γ/°                                         | 90.00                                                                        |
| Volume/Å <sup>3</sup>                       | 7483.13(19)                                                                  |
| Z                                           | 16                                                                           |
| ρ <sub>calc</sub> /mg/mm <sup>3</sup>       | 1.602                                                                        |
| μ/mm <sup>-1</sup>                          | 1.403                                                                        |
| F(000)                                      | 3648.0                                                                       |
| 2θ range for data collection                | 8.98 to 146.12°                                                              |
| Index ranges                                | -24 ≤ h ≤ 20, -23 ≤ k ≤ 21, -23 ≤ l ≤ 11                                     |
| Reflections collected                       | 10978                                                                        |
| Independent reflections                     | 3716[R(int) = 0.0292]                                                        |
| Data/restraints/parameters                  | 3716/0/281                                                                   |
| Goodness-of-fit on F <sup>2</sup>           | 1.054                                                                        |
| Final R indexes [I ≥ 2σ (I)]                | R <sub>1</sub> = 0.0555, wR <sub>2</sub> = 0.1460                            |
| Final R indexes [all data]                  | R <sub>1</sub> = 0.0647, wR <sub>2</sub> = 0.1533                            |
| Largest diff. peak/hole / e Å <sup>-3</sup> | 0.74/-0.47                                                                   |

**Table 2 Fractional Atomic Coordinates ( $\times 10^4$ ) and Equivalent Isotropic Displacement Parameters ( $\text{\AA}^2 \times 10^3$ ) for exp\_758.  $U_{eq}$  is defined as 1/3 of the trace of the orthogonalised  $U_{ij}$  tensor.**

| <b>Atom</b> | <b>x</b>    | <b>y</b>    | <b>z</b>     | <b>U(eq)</b> |
|-------------|-------------|-------------|--------------|--------------|
| F17         | 5004.1 (8)  | 3253.5 (8)  | 243.9 (9)    | 39.0 (4)     |
| O10         | 2175.9 (9)  | 4895.6 (9)  | -1227.8 (8)  | 26.2 (4)     |
| F18         | 4354.4 (9)  | 2878.2 (8)  | -562.3 (9)   | 44.9 (4)     |
| F19         | 3926.6 (9)  | 3201.4 (8)  | 405.4 (10)   | 47.7 (5)     |
| O28         | -316.7 (10) | 4662.9 (12) | -1469.6 (10) | 42.8 (5)     |
| N8          | 2499.5 (10) | 5159.6 (10) | -139.3 (10)  | 22.6 (4)     |
| O31         | 175.7 (11)  | 3557.9 (12) | 1475.1 (10)  | 45.5 (5)     |
| F13         | 5088.0 (12) | 5259.2 (18) | -2191.3 (10) | 97.8 (11)    |
| C20         | 1434.5 (12) | 4566.9 (12) | -320.9 (11)  | 22.4 (5)     |
| O30         | 1234.4 (11) | 3798.3 (11) | 1637.8 (9)   | 40.7 (5)     |
| N29         | 723.7 (12)  | 3772.8 (12) | 1276.9 (11)  | 32.5 (5)     |
| C2          | 3768.7 (12) | 4445.8 (12) | -210.2 (12)  | 23.7 (5)     |
| C21         | 1384.2 (12) | 4300.1 (12) | 345.0 (12)   | 24.9 (5)     |
| C7          | 3099.1 (12) | 5544.9 (12) | -354.2 (12)  | 23.0 (5)     |
| C22         | 773.7 (13)  | 4025.6 (13) | 559.3 (12)   | 26.9 (5)     |
| C5          | 4785.7 (12) | 4932.6 (13) | -1075.0 (12) | 26.3 (5)     |
| C25         | 871.1 (12)  | 4556.6 (12) | -754.8 (11)  | 24.4 (5)     |
| N26         | -332.1 (12) | 4301.3 (14) | -962.2 (11)  | 38.4 (6)     |
| C23         | 204.5 (13)  | 3998.7 (14) | 142.3 (13)   | 29.5 (5)     |
| C16         | 4404.3 (13) | 3350.2 (13) | -62.7 (14)   | 31.1 (5)     |
| C6          | 4215.8 (12) | 5329.3 (12) | -935.1 (11)  | 24.0 (5)     |
| C4          | 4846.3 (12) | 4287.1 (13) | -788.7 (13)  | 27.1 (5)     |
| F14         | 5546.8 (13) | 5792.3 (12) | -1384.4 (12) | 77.9 (8)     |
| F15         | 5853.5 (12) | 4807.3 (14) | -1604.8 (16) | 95.5 (10)    |
| C24         | 276.2 (13)  | 4277.5 (14) | -513.7 (12)  | 28.5 (5)     |
| C1          | 3705.8 (12) | 5088.6 (12) | -502.9 (11)  | 22.0 (5)     |
| C11         | 3264.3 (13) | 6069.6 (13) | 196.5 (13)   | 30.2 (5)     |
| C9          | 2077.8 (12) | 4884.6 (12) | -597.9 (11)  | 22.2 (5)     |
| C12         | 5311.8 (13) | 5197.9 (14) | -1567.7 (13) | 31.0 (6)     |
| C3          | 4336.0 (13) | 4052.5 (12) | -355.9 (12)  | 26.0 (5)     |
| O27         | -823.7 (13) | 3978.3 (18) | -782.9 (14)  | 79.6 (10)    |

**Table 3 Anisotropic Displacement Parameters ( $\text{\AA}^2 \times 10^3$ ) for exp\_758. The Anisotropic displacement factor exponent takes the form:  $-2\pi^2[h^2a^{*2}U_{11}+\dots+2hka \times b \times U_{12}]$**

| Atom | $U_{11}$  | $U_{22}$  | $U_{33}$  | $U_{23}$   | $U_{13}$   | $U_{12}$   |
|------|-----------|-----------|-----------|------------|------------|------------|
| F17  | 40.4 (9)  | 33.2 (8)  | 43.4 (9)  | 1.3 (7)    | -15.0 (7)  | 5.6 (6)    |
| O10  | 32.4 (9)  | 33.1 (9)  | 13.0 (8)  | 2.5 (6)    | 1.9 (6)    | 0.6 (7)    |
| F18  | 58.8 (11) | 28.1 (8)  | 47.8 (10) | -9.9 (7)   | -18.8 (8)  | 6.8 (7)    |
| F19  | 50 (1)    | 34.2 (9)  | 59.0 (11) | 16.0 (8)   | 13.3 (9)   | 5.6 (7)    |
| O28  | 37.1 (11) | 67.0 (14) | 24.4 (9)  | 9.4 (9)    | -8.4 (8)   | 0.1 (10)   |
| N8   | 25.7 (10) | 29 (1)    | 13.0 (9)  | 3.2 (7)    | 1.7 (7)    | 1.2 (8)    |
| O31  | 42.7 (12) | 63.8 (14) | 30 (1)    | 15.7 (10)  | 3.7 (9)    | -13.3 (10) |
| F13  | 62.6 (14) | 208 (3)   | 23.3 (10) | 17.7 (14)  | -2.6 (9)   | -61.5 (17) |
| C20  | 27.1 (12) | 25.6 (11) | 14.5 (10) | -0.9 (9)   | -0.1 (9)   | 2.7 (9)    |
| O30  | 45.8 (12) | 52.1 (12) | 24.3 (9)  | 15.6 (8)   | -9.2 (8)   | -11.3 (9)  |
| N29  | 38.7 (12) | 37.9 (12) | 21 (1)    | 7.5 (9)    | -1.4 (9)   | -5.5 (9)   |
| C2   | 26.4 (11) | 25.9 (11) | 18.8 (10) | -1.1 (9)   | -1.3 (9)   | -0.5 (9)   |
| C21  | 28.4 (12) | 27.1 (12) | 19.3 (11) | 2.5 (9)    | -4.8 (9)   | 0.0 (9)    |
| C7   | 26.9 (12) | 23.8 (11) | 18.4 (10) | 3.9 (9)    | 1.5 (9)    | 2.1 (9)    |
| C22  | 34.3 (13) | 29.9 (12) | 16.5 (11) | 3.9 (9)    | -0.7 (9)   | -1.1 (10)  |
| C5   | 26.9 (12) | 33.4 (13) | 18.4 (11) | -5.7 (10)  | -1.9 (9)   | -2.2 (10)  |
| C25  | 28.9 (12) | 31.2 (12) | 13.1 (10) | 0.8 (9)    | -0.3 (9)   | 1.2 (9)    |
| N26  | 30.4 (12) | 61.4 (16) | 23.4 (11) | 2.7 (11)   | -5.1 (9)   | -6.3 (11)  |
| C23  | 30.0 (13) | 36.6 (14) | 21.9 (12) | 1.8 (10)   | 1.4 (10)   | -5.5 (10)  |
| C16  | 32.1 (13) | 29.0 (13) | 32.2 (13) | -1.9 (10)  | -5.2 (11)  | 4 (1)      |
| C6   | 29.3 (12) | 25.7 (12) | 17 (1)    | -1.1 (9)   | -1.5 (9)   | -1.5 (9)   |
| C4   | 24.8 (12) | 31.2 (12) | 25.2 (11) | -7.2 (10)  | -1.9 (9)   | 3.8 (9)    |
| F14  | 91.9 (17) | 70.5 (14) | 71.2 (14) | -28.6 (12) | 49.5 (13)  | -45.0 (13) |
| F15  | 60.4 (14) | 89.5 (18) | 137 (2)   | 48.1 (17)  | 63.2 (16)  | 30.5 (13)  |
| C24  | 28.8 (13) | 38.5 (14) | 18.3 (11) | -1.6 (10)  | -3.8 (9)   | -1.3 (10)  |
| C1   | 25.8 (11) | 26.2 (11) | 14.1 (10) | -3.3 (8)   | -1.5 (9)   | -1.4 (9)   |
| C11  | 35.1 (14) | 29.7 (13) | 25.9 (12) | -3.3 (10)  | 4.2 (10)   | 1.7 (10)   |
| C9   | 26.5 (11) | 24.5 (11) | 15.6 (10) | 2.5 (8)    | 0.1 (9)    | 5.9 (9)    |
| C12  | 28.2 (13) | 42.4 (15) | 22.5 (12) | -5 (1)     | 2.7 (10)   | -2.8 (11)  |
| C3   | 30.4 (12) | 25.5 (12) | 22.2 (11) | -3.6 (9)   | -5.5 (9)   | 0.8 (9)    |
| O27  | 49.6 (15) | 136 (3)   | 52.9 (15) | 39.4 (16)  | -22.7 (12) | -48.3 (16) |

**Table 4 Bond Lengths for exp\_758.**

| Atom | Atom | Length/ $\text{\AA}$ | Atom | Atom | Length/ $\text{\AA}$ |
|------|------|----------------------|------|------|----------------------|
| F17  | C16  | 1.335 (3)            | C21  | C22  | 1.381 (4)            |
| O10  | C9   | 1.232 (3)            | C7   | C1   | 1.522 (3)            |
| F18  | C16  | 1.343 (3)            | C7   | C11  | 1.518 (3)            |
| F19  | C16  | 1.337 (3)            | C22  | C23  | 1.381 (4)            |
| O28  | N26  | 1.212 (3)            | C5   | C6   | 1.393 (3)            |

|     |     |           |     |     |           |
|-----|-----|-----------|-----|-----|-----------|
| N8  | C7  | 1.463 (3) | C5  | C4  | 1.391 (4) |
| N8  | C9  | 1.329 (3) | C5  | C12 | 1.500 (3) |
| O31 | N29 | 1.220 (3) | C25 | C24 | 1.375 (3) |
| F13 | C12 | 1.288 (3) | N26 | C24 | 1.479 (3) |
| C20 | C21 | 1.393 (3) | N26 | O27 | 1.209 (3) |
| C20 | C25 | 1.390 (3) | C23 | C24 | 1.388 (3) |
| C20 | C9  | 1.510 (3) | C16 | C3  | 1.500 (3) |
| O30 | N29 | 1.224 (3) | C6  | C1  | 1.389 (3) |
| N29 | C22 | 1.476 (3) | C4  | C3  | 1.386 (4) |
| C2  | C1  | 1.391 (3) | F14 | C12 | 1.307 (3) |
| C2  | C3  | 1.388 (3) | F15 | C12 | 1.317 (3) |

**Table 5 Bond Angles**

| Atom | Atom | Atom | Angle/°     | Atom | Atom | Atom | Angle/°     |
|------|------|------|-------------|------|------|------|-------------|
| C9   | N8   | C7   | 121.74 (19) | F17  | C16  | C3   | 112.2 (2)   |
| C21  | C20  | C9   | 122.9 (2)   | F18  | C16  | C3   | 111.1 (2)   |
| C25  | C20  | C21  | 119.6 (2)   | F19  | C16  | F18  | 106.4 (2)   |
| C25  | C20  | C9   | 117.5 (2)   | F19  | C16  | C3   | 113.2 (2)   |
| O31  | N29  | O30  | 124.2 (2)   | C1   | C6   | C5   | 120.5 (2)   |
| O31  | N29  | C22  | 118.1 (2)   | C3   | C4   | C5   | 118.8 (2)   |
| O30  | N29  | C22  | 117.8 (2)   | C25  | C24  | N26  | 118.6 (2)   |
| C3   | C2   | C1   | 119.8 (2)   | C25  | C24  | C23  | 123.6 (2)   |
| C22  | C21  | C20  | 119.1 (2)   | C23  | C24  | N26  | 117.7 (2)   |
| N8   | C7   | C1   | 112.38 (19) | C2   | C1   | C7   | 122.0 (2)   |
| N8   | C7   | C11  | 109.08 (19) | C6   | C1   | C2   | 119.3 (2)   |
| C11  | C7   | C1   | 111.46 (19) | C6   | C1   | C7   | 118.6 (2)   |
| C21  | C22  | N29  | 118.1 (2)   | O10  | C9   | N8   | 123.6 (2)   |
| C23  | C22  | N29  | 118.7 (2)   | O10  | C9   | C20  | 119.3 (2)   |
| C23  | C22  | C21  | 123.1 (2)   | N8   | C9   | C20  | 117.15 (19) |
| C6   | C5   | C12  | 118.9 (2)   | F13  | C12  | C5   | 112.9 (2)   |
| C4   | C5   | C6   | 120.3 (2)   | F13  | C12  | F14  | 106.9 (3)   |
| C4   | C5   | C12  | 120.7 (2)   | F13  | C12  | F15  | 106.3 (3)   |
| C24  | C25  | C20  | 118.8 (2)   | F14  | C12  | C5   | 112.6 (2)   |
| O28  | N26  | C24  | 118.2 (2)   | F14  | C12  | F15  | 104.5 (3)   |
| O27  | N26  | O28  | 124.1 (2)   | F15  | C12  | C5   | 113.0 (2)   |
| O27  | N26  | C24  | 117.6 (2)   | C2   | C3   | C16  | 120.6 (2)   |



|     |     |     |          |    |    |     |          |
|-----|-----|-----|----------|----|----|-----|----------|
| C22 | C23 | C24 | 115.8(2) | C4 | C3 | C2  | 121.3(2) |
| F17 | C16 | F18 | 106.5(2) | C4 | C3 | C16 | 118.0(2) |
| F17 | C16 | F19 | 106.9(2) |    |    |     |          |

**Table 6 Hydrogen Atom Coordinates ( $\text{\AA}\times 10^4$ ) and Isotropic Displacement Parameters ( $\text{\AA}^2\times 10^3$ )**

| Atom | <i>x</i> | <i>y</i> | <i>Z</i> | U(eq) |
|------|----------|----------|----------|-------|
| H8   | 2418     | 5110     | 295      | 27    |
| H2   | 3432     | 4280     | 82       | 28    |
| H21  | 1757     | 4307     | 641      | 30    |
| H7   | 2986     | 5788     | -782     | 28    |
| H25  | 896      | 4735     | -1200    | 29    |
| H23  | -201     | 3806     | 292      | 35    |
| H6   | 4177     | 5758     | -1133    | 29    |
| H4   | 5222     | 4018     | -886     | 32    |
| H11A | 2881     | 6365     | 260      | 45    |
| H11B | 3651     | 6332     | 53       | 45    |
| H11C | 3366     | 5844     | 625      | 45    |

### Experimental

Single crystals of C<sub>17</sub>H<sub>11</sub>F<sub>6</sub>N<sub>3</sub>O<sub>5</sub> were grown in Toluene. A suitable crystal was selected and on a Xcalibur, Eos, Gemini diffractometer. The crystal was kept at 134(8) K during data collection. Using Olex2 [1], the structure was solved with the ShelXS [2] structure solution program using Direct Methods and refined with the ShelXL [3] refinement package using Least Squares minimisation.

Crystal structure determination

**Crystal Data** for C<sub>17</sub>H<sub>11</sub>F<sub>6</sub>N<sub>3</sub>O<sub>5</sub> (*M* = 451.29): tetragonal, space group I41/a (no. 88), *a* = 19.6845(3) Å, *c* = 19.3124(3) Å, *V* =

7483.13(19) Å<sup>3</sup>, *Z* = 16, *T* = 134(8) K,  $\mu(\text{Cu K}\alpha) = 1.403 \text{ mm}^{-1}$ , *D*<sub>calc</sub> = 1.602 g/mm<sup>3</sup>, 10978 reflections measured ( $8.98 \leq 2\theta \leq 146.12$ ), 3716

Unique (*R*<sub>int</sub> = 0.0292) which were used in all calculations. The final *R*<sub>1</sub> was 0.0555

(>2σ(I)) and *wR*<sub>2</sub> was 0.1533 (all data).
